# Supplementary material for: Genomic-based taxonomic classification of the family Erythrobacteraceae
Source: PubMed Central journal article supplement (PMC7660246; doi:10.1099/ijsem.0.004293), 2020-07-29
Supplement: ijsem-70-4470-s001.pdf [file ijsem-70-4470-s001.pdf]

---

1 **Supplementary material**

2 **Genomic-based taxonomic classification of the family *Erythrobacteraceae***

3  
4 Lin Xu<sup>1,2</sup>, Cong Sun<sup>1,2</sup>, Chen Fang<sup>1,3</sup>, Aharon Oren<sup>4</sup> and Xue-Wei Xu<sup>1,5</sup>

5  
6 <sup>1</sup> Key Laboratory of Marine Ecosystem Dynamics, Ministry of Natural Resources &  
7 Second Institute of Oceanography, Ministry of Natural Resources, Hangzhou 310012,  
8 PR China

9 <sup>2</sup> College of Life Sciences and Medicine, Zhejiang Sci-Tech University, Hangzhou  
10 310018, PR China

11 <sup>3</sup> College of Oceanography, Hohai University, Nanjing 210000, PR China

12 <sup>4</sup> The Institute of Life Sciences, The Hebrew University of Jerusalem, Edmond J.  
13 Safra Campus, Jerusalem 9190401, Israel

14 <sup>5</sup> School of Oceanography, Shanghai Jiao Tong University, Shanghai 200030, PR  
15 China

16  
17  
18 \*Corresponding author: 36<sup>th</sup> North Baochu Road, Ministry of Natural Resources &  
19 Second Institute of Oceanography, Ministry of Natural Resources, Hangzhou 310012,  
20 PR China (X.-W. Xu)

21 Email address: xuxw@sio.org.cn (X.-W. Xu)

22  
23  
24  
25  
26  
27  
28  
29  
30  
31  
32  
33  
34  
35  
36  
37  
38  
39  
40  
41  
42

16 Table S1. Currently validly-published genera and species belonging to the family *Erythrobacteraceae*.

| Genus and species         | Type strain           | 16S rRNA gene accession number | Source                                        | Reference |
|---------------------------|-----------------------|--------------------------------|-----------------------------------------------|-----------|
| <i>Altererythrobacter</i> |                       |                                |                                               |           |
| <i>Aeb. aerius</i>        | 100921-2 <sup>T</sup> | KU311004.                      | Air                                           | [1]       |
| <i>Aeb. aerophilus</i>    | Ery1 <sup>T</sup>     | MG183676                       | Seawater                                      | [2]       |
| <i>Aeb. aestiaquae</i>    | HDW-31 <sup>T</sup>   | KJ658262                       | Seawater                                      | [3]       |
| <i>Aeb. aestuarii</i>     | KYW147 <sup>T</sup>   | FJ997597                       | Seawater                                      | [4]       |
| <i>Aeb. amylolyticus</i>  | NS1 <sup>T</sup>      | KX601069                       | Lake sediment                                 | [5]       |
| <i>Aeb. aquaemixtae</i>   | JSSK-8 <sup>T</sup>   | KY614064                       | Ocean and freshwater spring junction water    | [6]       |
| <i>Aeb. aquiaggeris</i>   | KEM-3 <sup>T</sup>    | KX812543                       | Estuary water                                 | [7]       |
| <i>Aeb. aquimixticola</i> | SSKS-13 <sup>T</sup>  | MK194299                       | Ocean and freshwater spring junction sediment | [8]       |
| <i>Aeb. atlanticus</i>    | 26DY36 <sup>T</sup>   | KC018454                       | Marine sediment                               | [9]       |
| <i>Aeb. aurantiacus</i>   | O30 <sup>T</sup>      | KF924607                       | Marine sediment                               | [10]      |
| <i>Aeb. buctensis</i>     | M0322 <sup>T</sup>    | KJ599648                       | Mudstone core                                 | [11]      |
| <i>Aeb. confluentis</i>   | KEM-4 <sup>T</sup>    | KX129915                       | Estuary water                                 | [12]      |
| <i>Aeb. deserti</i>       | THG-S3 <sup>T</sup>   | KY287245                       | Desert sand                                   | [13]      |
| <i>Aeb. dongtanensis</i>  | JM27 <sup>T</sup>     | GU166344                       | Tidal flat                                    | [14]      |
| <i>Aeb. endophyticus</i>  | BR75 <sup>T</sup>     | KY310591                       | Salt marsh plant                              | [15]      |
| <i>Aeb. epoxidivorans</i> | JCS350 <sup>T</sup>   | DQ304436                       | Marine sediment                               | [16]      |
| <i>Aeb. flavus</i>        | MS1-4 <sup>T</sup>    | KX099616                       | Mangrove sediment                             | [17]      |
| <i>Aeb. fulvus</i>        | S-54 <sup>T</sup>     | KY117470                       | Soil                                          | [18]      |
| <i>Aeb. gangjinensis</i>  | KJ7 <sup>T</sup>      | JF751048                       | Tidal flat                                    | [19]      |
| <i>Aeb. halimionae</i>    | CPA5 <sup>T</sup>     | KY310593                       | Salt marsh plant                              | [15]      |

| Genus and species         | Type strain             | 16S rRNA gene accession number | Source            | Reference |
|---------------------------|-------------------------|--------------------------------|-------------------|-----------|
| <i>Aeb. indicus</i>       | MSSRF26 <sup>T</sup>    | DQ399262                       | Wild rice         | [20]      |
| <i>Aeb. insulae</i>       | BPTF-M16 <sup>T</sup>   | MH206217                       | Tidal flat        | [21]      |
| <i>Aeb. ishigakiensis</i> | JPCCMB0017 <sup>T</sup> | AB363004                       | Marine sediment   | [22]      |
| <i>Aeb. lauratis</i>      | YIM 75003 <sup>T</sup>  | KX808673                       | Hot spring        | [23]      |
| <i>Aeb. luteolus</i>      | SW-109 <sup>T</sup>     | AY739662                       | Tidal flat        | [24]      |
| <i>Aeb. lutipelagi</i>    | GH1-16 <sup>T</sup>     | LT797153                       | Tidal flat        | [25]      |
| <i>Aeb. mangrovi</i>      | C9-11 <sup>T</sup>      | MF034045                       | Mangrove sediment | [26]      |
| <i>Aeb. marensis</i>      | MSW-14 <sup>T</sup>     | FM177586                       | Seawater          | [27]      |
| <i>Aeb. marinus</i>       | H32 <sup>T</sup>        | EU726272                       | Seawater          | [28]      |
| <i>Aeb. maritimus</i>     | HME9302 <sup>T</sup>    | KF385494                       | Seawater          | [29]      |
| <i>Aeb. namhicola</i>     | KYW48 <sup>T</sup>      | FJ935793                       | Seawater          | [4]       |
| <i>Aeb. oceanensis</i>    | Y2 <sup>T</sup>         | KF924606                       | Marine sediment   | [30]      |
| <i>Aeb. palmitatis</i>    | YIM 75004 <sup>T</sup>  | KX808674                       | Hot spring        | [23]      |
| <i>Aeb. rigui</i>         | WW3 <sup>T</sup>        | KP997219                       | Freshwater        | [31]      |
| <i>Aeb. salegens</i>      | XY-R17 <sup>T</sup>     | KT886062                       | Marine sediment   | [32]      |
| <i>Aeb. sediminis</i>     | CAU1172 <sup>T</sup>    | KP779619                       | Marine sediment   | [33]      |
| <i>Aeb. soli</i>          | MN-1 <sup>T</sup>       | KT906300                       | Desert sand       | [34]      |
| <i>Aeb. troitsensis</i>   | KMM 6042 <sup>T</sup>   | AY676115                       | Sea urchin        | [35]      |
| <i>Aeb. xiamenensis</i>   | LY02 <sup>T</sup>       | KC520828                       | Seawater          | [36]      |
| <i>Aeb. xinjiangensis</i> | S3-63 <sup>T</sup>      | HM028673                       | Desert sand       | [37]      |
| <i>Aeb. xixiisoli</i>     | S36 <sup>T</sup>        | KJ150597                       | Soil              | [38]      |
| <i>Croceibacterium</i>    |                         |                                |                   |           |

| Genus and species         | Type strain           | 16S rRNA gene accession number | Source                                     | Reference |
|---------------------------|-----------------------|--------------------------------|--------------------------------------------|-----------|
| <i>Crb. ferulae</i>       | SX2RGS8 <sup>T</sup>  | KX289944                       | Medicinal plant                            | [39]      |
| <i>Crb. mercuriale</i>    | Coronado <sup>T</sup> | KP122961                       | Stadium seat                               | [40]      |
| <i>Croceicoccus</i>       |                       |                                |                                            |           |
| <i>Ccc. marinus</i>       | E4A9 <sup>T</sup>     | EF623998                       | Marine sediment                            | [41]      |
| <i>Ccc. mobilis</i>       | Ery22 <sup>T</sup>    | KT383846                       | Marine sediment                            | [42]      |
| <i>Ccc. naphthovorans</i> | PQ-2 <sup>T</sup>     | KF145127                       | Marine biofilm                             | [43]      |
| <i>Ccc. pelagius</i>      | Ery9 <sup>T</sup>     | KT383844                       | Marine sediment                            | [42]      |
| <i>Erythrobacter</i>      |                       |                                |                                            |           |
| <i>Erb. aquimaris</i>     | SW-110 <sup>T</sup>   | AY461441                       | Tidal flat                                 | [44]      |
| <i>Erb. aquimixticola</i> | JSSK-14 <sup>T</sup>  | KY614066                       | Ocean and freshwater spring junction water | [45]      |
| <i>Erb. arachoides</i>    | RC4-10-4 <sup>T</sup> | KU302715                       | Glacier                                    | [46]      |
| <i>Erb. atlanticus</i>    | s31-N3 <sup>T</sup>   | KP994305                       | Marine sediment                            | [47]      |
| <i>Erb. citreus</i>       | RE35F/1 <sup>T</sup>  | AF118020                       | Seawater                                   | [48]      |
| <i>Erb. flavus</i>        | SW-46 <sup>T</sup>    | AF500004                       | Seawater                                   | [49]      |
| <i>Erb. gaetbuli</i>      | SW-161 <sup>T</sup>   | AY562220                       | Intertidal sediment                        | [50]      |
| <i>Erb. gangjinensis</i>  | K7-2 <sup>T</sup>     | EU428782                       | Seawater                                   | [51]      |
| <i>Erb. jejuensis</i>     | CNU001 <sup>T</sup>   | DQ453142                       | Seawater                                   | [52]      |
| <i>Erb. litoralis</i>     | T4 <sup>T</sup>       | AF465836                       | Marine cyanobacterial mat                  | [53]      |
| <i>Erb. longus</i>        | OCh101 <sup>T</sup>   | AF465835                       | Seaweed                                    | [54]      |
| <i>Erb. luteus</i>        | KA37 <sup>T</sup>     | KP197673                       | Mangrove sediment                          | [55]      |
| <i>Erb. lutimaris</i>     | S-5 <sup>T</sup>      | KJ870094                       | Intertidal sediment                        | [56]      |
| <i>Erb. marinus</i>       | HWDM-33 <sup>T</sup>  | HQ117934                       | Seawater                                   | [57]      |

| Genus and species           | Type strain                | 16S rRNA gene accession number | Source                                | Reference |
|-----------------------------|----------------------------|--------------------------------|---------------------------------------|-----------|
| <i>Erb. marisflavi</i>      | KEM-5 <sup>T</sup>         | MK121890                       | Estuary water                         | [58]      |
| <i>Erb. nanhaisediminis</i> | T30 <sup>T</sup>           | FJ654473                       | Marine sediment                       | [59]      |
| <i>Erb. odishensis</i>      | JA747 <sup>T</sup>         | HE680094                       | Saltern soil                          | [60]      |
| <i>Erb. pelagi</i>          | UST081027-248 <sup>T</sup> | HQ203045                       | Seawater                              | [61]      |
| <i>Erb. seohaensis</i>      | SW-135 <sup>T</sup>        | AY562219                       | Intertidal sediment                   | [50]      |
| <i>Erb. spongiae</i>        | HN-E23 <sup>T</sup>        | MG655147                       | Marine sponge                         | [62]      |
| <i>Erb. vulgaris</i>        | 022-2-10 <sup>T</sup>      | AY706935                       | Marine starfish                       | [63]      |
| <i>Erb. xanthus</i>         | SM1501 <sup>T</sup>        | KU529278                       | Seawater                              | [64]      |
| <i>Erb. zhengii</i>         | V18 <sup>T</sup>           | MG183678                       | Marine sediment                       | [65]      |
| <i>Erythromicrobium</i>     |                            |                                |                                       |           |
| <i>Erm. ramosum</i>         | E5 <sup>T</sup>            | AF465837                       | Alkaline spring cyanobacterial spring | [53]      |
| <i>Porphyrobacter</i>       |                            |                                |                                       |           |
| <i>Por. algicida</i>        | 2-22 <sup>T</sup>          | KU981071                       | Seawater                              | [66]      |
| <i>Por. colymbi</i>         | TPW-24 <sup>T</sup>        | AB702992                       | Swimming pool water                   | [67]      |
| <i>Por. cryptus</i>         | ALC-2 <sup>T</sup>         | AF465834                       | Hot spring                            | [68]      |
| <i>Por. dokdonensis</i>     | DSW-74 <sup>T</sup>        | DQ011529                       | Seawater                              | [69]      |
| <i>Por. donghaensis</i>     | SW-132 <sup>T</sup>        | AY559428                       | Seawater                              | [70]      |
| <i>Por. neustonensis</i>    | ACM 2844 <sup>T</sup>      | AB033327                       | Freshwater                            | [71]      |
| <i>Por. sanguineus</i>      | A91 <sup>T</sup>           | AB021493                       | Seawater                              | [72]      |
| <i>Por. tepidarius</i>      | OT3 <sup>T</sup>           | AB033328                       | Hot spring                            | [73]      |
| <i>Qipengyuania</i>         |                            |                                |                                       |           |
| <i>Opy. sediminis</i>       | M1 <sup>T</sup>            | KJ734993                       | Subterrestrial sediment               | [74]      |

18 Table S2. Genomic completeness and contamination as well as rRNA and tRNA gene counts of obtained *Erythrobacteraceae* genomes.

| Genomes                                             | Genomic quality  |                   | Gene counts |           |
|-----------------------------------------------------|------------------|-------------------|-------------|-----------|
|                                                     | Completeness (%) | Contamination (%) | rRNA gene   | tRNA gene |
| <i>Aeb. aerius</i> 100921-2 <sup>T</sup>            | 99.4             | 0.1               | 3           | 48        |
| <i>Aeb. aerophilus</i> Ery1 <sup>T</sup>            | 99.6             | 4.9               | 3           | 45        |
| <i>Aeb. aestiaquae</i> KCTC 42006 <sup>T</sup>      | 98.5             | 0.2               | 3           | 42        |
| <i>Aeb. aestuarii</i> JCM 16339 <sup>T</sup>        | 99.1             | 0.4               | 3           | 45        |
| <i>Aeb. amylolyticus</i> NS1 <sup>T</sup>           | 99.5             | 0.3               | 3           | 45        |
| <i>Aeb. aquaemixtae</i> KCTC 52763 <sup>T</sup>     | 99.0             | 1.1               | 3           | 45        |
| <i>Aeb. aquimixticola</i> SSKS-13 <sup>T</sup>      | 98.8             | 0.2               | 3           | 45        |
| <i>Aeb. atlanticus</i> 26DY36 <sup>T</sup>          | 99.5             | 1.8               | 6           | 47        |
| <i>Aeb. aurantiacus</i> MCCC 1A09962 <sup>T</sup>   | 98.7             | 0.3               | 3           | 41        |
| <i>Aeb. buctensis</i> M0322 <sup>T</sup>            | 98.9             | 0.5               | 3           | 47        |
| <i>Aeb. confluentis</i> KCTC 52259 <sup>T</sup>     | 99.4             | 0.1               | 6           | 46        |
| <i>Aeb. dongtanensis</i> KCTC 22672 <sup>T</sup>    | 99.5             | 0.2               | 3           | 47        |
| <i>Aeb. endophyticus</i> LMG 29518 <sup>T</sup>     | 99.3             | 0.3               | 3           | 45        |
| <i>Aeb. epoxidivorans</i> CGMCC 1.7731 <sup>T</sup> | 99.2             | 1.3               | 3           | 43        |
| <i>Aeb. flavus</i> MS1-4 <sup>T</sup>               | 99.1             | 1.0               | 4           | 46        |
| <i>Aeb. gangjinensis</i> JCM 17802 <sup>T</sup>     | 99.2             | 0.1               | 3           | 42        |
| <i>Aeb. halimionae</i> LMG 29519 <sup>T</sup>       | 99.2             | 0.5               | 3           | 44        |
| <i>Aeb. indicus</i> DSM 18604 <sup>T</sup>          | 99.4             | 0.9               | 17          | 54        |
| <i>Aeb. insulae</i> BPTF-M16 <sup>T</sup>           | 98.4             | 2.8               | 9           | 47        |
| <i>Aeb. ishigakiensis</i> NBRC 107699 <sup>T</sup>  | 98.9             | 0.7               | 3           | 42        |
| <i>Aeb. luteolus</i> SW-109 <sup>T</sup>            | 99.9             | 0.3               | 12          | 52        |

| Genomes                                                | Genomic quality  |                   | Gene counts |           |
|--------------------------------------------------------|------------------|-------------------|-------------|-----------|
|                                                        | Completeness (%) | Contamination (%) | rRNA gene   | tRNA gene |
| <i>Aeb. lutipelagi</i> GH1-16 <sup>T</sup>             | 99.6             | 0.6               | 3           | 44        |
| <i>Aeb. mangrovi</i> C9-11 <sup>T</sup>                | 99.0             | 0.8               | 3           | 46        |
| <i>Aeb. marensis</i> KCTC 22370 <sup>T</sup>           | 99.5             | 0.6               | 3           | 45        |
| <i>Aeb. marinus</i> H32 <sup>T</sup>                   | 99.4             | 0.3               | 3           | 46        |
| <i>Aeb. maritimus</i> HME9302 <sup>T</sup>             | 99.2             | 1.7               | 3           | 43        |
| <i>Aeb. namhicola</i> JCM 16345 <sup>T</sup>           | 99.5             | 0                 | 3           | 44        |
| <i>Aeb. oceanensis</i> MCCC 1A09965 <sup>T</sup>       | 99.2             | 0.2               | 3           | 45        |
| <i>Aeb. rigui</i> KCTC 42620 <sup>T</sup>              | 99.3             | 0                 | 3           | 49        |
| <i>Aeb. salegens</i> MCCC 1K01500 <sup>T</sup>         | 99.3             | 0.7               | 3           | 47        |
| <i>Aeb. sediminis</i> KCTC 42453 <sup>T</sup>          | 99.2             | 0.2               | 3           | 42        |
| <i>Aeb. soli</i> MCCC 1K02066 <sup>T</sup>             | 99.6             | 0                 | 3           | 48        |
| <i>Aeb. troitsensis</i> JCM 17037 <sup>T</sup>         | 99.6             | 0.2               | 3           | 45        |
| <i>Aeb. xiamenensis</i> CGMCC 1.12494 <sup>T</sup>     | 99.1             | 0.3               | 3           | 44        |
| <i>Aeb. xinjiangensis</i> CCTCC AB 207166 <sup>T</sup> | 97.8             | 0.7               | 3           | 47        |
| <i>Aeb. xixiisoli</i> S36 <sup>T</sup>                 | 99.4             | 2.4               | 3           | 48        |
| <i>Crb. ferulae</i> SX2RGS8 <sup>T</sup>               | 97.6             | 1.1               | 3           | 51        |
| <i>Crb. mercuriale</i> Coronado <sup>T</sup>           | 98.1             | 0.4               | 3           | 48        |
| <i>Ccc. marinus</i> E4A9 <sup>T</sup>                  | 99.6             | 1.8               | 6           | 48        |
| <i>Ccc. mobilis</i> Ery22 <sup>T</sup>                 | 99.4             | 2.7               | 12          | 54        |
| <i>Ccc. naphthovorans</i> PQ-2 <sup>T</sup>            | 99.5             | 0.3               | 3           | 45        |
| <i>Ccc. pelagius</i> Ery9 <sup>T</sup>                 | 99.3             | 0.5               | 9           | 51        |
| <i>Erb. aquimaris</i> JCM 12189 <sup>T</sup>           | 99.6             | 0                 | 3           | 45        |

| Genomes                                               | Genomic quality  |                   | Gene counts |           |
|-------------------------------------------------------|------------------|-------------------|-------------|-----------|
|                                                       | Completeness (%) | Contamination (%) | rRNA gene   | tRNA gene |
| <i>Erb. aquimixticola</i> JSSK-14 <sup>T</sup>        | 99.2             | 1.2               | 3           | 45        |
| <i>Erb. arachoides</i> RC4-10-4 <sup>T</sup>          | 99.5             | 0.4               | 3           | 46        |
| <i>Erb. atlanticus</i> s21-N3 <sup>T</sup>            | 99.1             | 1.1               | 3           | 45        |
| <i>Erb. citreus</i> CGMCC 1.8703 <sup>T</sup>         | 99.8             | 0.4               | 12          | 52        |
| <i>Erb. gaetbuli</i> DSM 16225 <sup>T</sup>           | 99.8             | 0.3               | 3           | 45        |
| <i>Erb. gangjinensis</i> CGMCC 1.15024 <sup>T</sup>   | 99.2             | 0.6               | 3           | 43        |
| <i>Erb. jejuensis</i> JCM 16677 <sup>T</sup>          | 98.3             | 4.8               | 6           | 61        |
| <i>Erb. litoralis</i> DSM 8509 <sup>T</sup>           | 99.2             | 0.9               | 3           | 45        |
| <i>Erb. longus</i> DSM 6997 <sup>T</sup>              | 99.6             | 0.6               | 3           | 42        |
| <i>Erb. luteus</i> KA37 <sup>T</sup>                  | 99.5             | 0                 | 3           | 45        |
| <i>Erb. lutimaris</i> S-5 <sup>T</sup>                | 99.5             | 0.3               | 11          | 44        |
| <i>Erb. marinus</i> KCTC 23554 <sup>T</sup>           | 99.2             | 0.5               | 3           | 43        |
| <i>Erb. marisflavi</i> KEM-5 <sup>T</sup>             | 99.9             | 0                 | 3           | 43        |
| <i>Erb. nanhaisediminis</i> CGMCC 1.7715 <sup>T</sup> | 99.8             | 0.1               | 3           | 44        |
| <i>Erb. odishensis</i> KCTC 23981 <sup>T</sup>        | 99.6             | 0.3               | 3           | 45        |
| <i>Erb. pelagi</i> JCM 17468 <sup>T</sup>             | 99.5             | 0                 | 3           | 44        |
| <i>Erb. seohaensis</i> SW-135 <sup>T</sup>            | 99.8             | 0.1               | 3           | 44        |
| <i>Erb. spongiae</i> HN-E23 <sup>T</sup>              | 99.8             | 0.5               | 3           | 45        |
| <i>Erb. vulgaris</i> DSM 17792 <sup>T</sup>           | 98.9             | 0                 | 3           | 45        |
| <i>Erb. xanthus</i> CCTCC AB 2015396 <sup>T</sup>     | 99.2             | 0.5               | 12          | 55        |
| <i>Erb. zhengii</i> V18 <sup>T</sup>                  | 99.9             | 3.0               | 3           | 46        |
| <i>Erm. ramosum</i> JCM 10282 <sup>T</sup>            | 99.5             | 1.1               | 3           | 44        |



| Genomes                                          | Genomic quality  |                   | Gene counts |           |
|--------------------------------------------------|------------------|-------------------|-------------|-----------|
|                                                  | Completeness (%) | Contamination (%) | rRNA gene   | tRNA gene |
| <i>Por. algicida</i> KEMB 9005-328 <sup>T</sup>  | 99.9             | 1.0               | 3           | 47        |
| <i>Por. colymbi</i> JCM 18338 <sup>T</sup>       | 99.3             | 0.9               | 3           | 44        |
| <i>Por. cryptus</i> DSM 12079 <sup>T</sup>       | 99.5             | 0                 | 3           | 44        |
| <i>Por. dokdonensis</i> DSM 17193 <sup>T</sup>   | 99.3             | 0.8               | 3           | 44        |
| <i>Por. donghaensis</i> DSM 16220 <sup>T</sup>   | 99.5             | 1.0               | 3           | 44        |
| <i>Por. neustonensis</i> DSM 9434 <sup>T</sup>   | 99.5             | 0.3               | 6           | 47        |
| <i>Por. sanguineus</i> JCM 20691 <sup>T</sup>    | 99.6             | 0.7               | 3           | 44        |
| <i>Por. tepidarius</i> DSM 10594 <sup>T</sup>    | 99.7             | 0                 | 3           | 44        |
| <i>Qpy. sediminis</i> CGMCC 1.12928 <sup>T</sup> | 99.5             | 0.2               | 3           | 44        |

- 20 Table S3. Sequence identities of annotated 16S rRNA genes within sequenced *Erythrobacteraceae* genomes in this study through the  
 21 EzBioCloud web server. Red indicates that the type strain has multi-copy 16S rRNA genes.

| Genome                                            | Closest type strain                         | Identity (%) |
|---------------------------------------------------|---------------------------------------------|--------------|
| <i>Aeb. aerius</i> 100921-2 <sup>T</sup>          | <i>Aeb. aerius</i> 100921-2 <sup>T</sup>    | 99.2         |
| <i>Aeb. aestiaquae</i> KCTC 42006 <sup>T</sup>    | <i>Aeb. aestiaquae</i> HDW-31 <sup>T</sup>  | 100.0        |
| <i>Aeb. aestuarii</i> JCM 16339 <sup>T</sup>      | <i>Aeb. aestuarii</i> KYW147 <sup>T</sup>   | 100.0        |
| <i>Aeb. aquaemixtae</i> KCTC 52763 <sup>T</sup>   | <i>Aeb. aquaemixtae</i> JSSK-8 <sup>T</sup> | 100.0        |
| <i>Aeb. aurantiacus</i> MCCC 1A09962 <sup>T</sup> | <i>Aeb. aurantiacus</i> O30 <sup>T</sup>    | 99.9         |
| <i>Aeb. buctensis</i> M0322 <sup>T</sup>          | <i>Aeb. buctensis</i> M0322 <sup>T</sup>    | 100.0        |
| <i>Aeb. confluentis</i> KCTC 52259 <sup>T</sup>   | <i>Aeb. confluentis</i> KEM-4 <sup>T</sup>  | 100.0        |
|                                                   | <i>Aeb. confluentis</i> KEM-4 <sup>T</sup>  | 100.0        |
| <i>Aeb. endophyticus</i> LMG 29518 <sup>T</sup>   | <i>Aeb. endophyticus</i> BR75 <sup>T</sup>  | 100.0        |
| <i>Aeb. gangjinensis</i> JCM 17802 <sup>T</sup>   | <i>Aeb. gangjinensis</i> KJ7 <sup>T</sup>   | 100.0        |
| <i>Aeb. halimionae</i> LMG 29519 <sup>T</sup>     | <i>Aeb. halimionae</i> CPA5 <sup>T</sup>    | 100.0        |
| <i>Aeb. indicus</i> DSM 18604 <sup>T</sup>        | <i>Aeb. indicus</i> MSSRF26 <sup>T</sup>    | 100.0        |
|                                                   | <i>Aeb. indicus</i> MSSRF26 <sup>T</sup>    | 100.0        |
|                                                   | <i>Aeb. indicus</i> MSSRF26 <sup>T</sup>    | 100.0        |
|                                                   | <i>Aeb. indicus</i> MSSRF26 <sup>T</sup>    | 100.0        |
|                                                   | <i>Aeb. indicus</i> MSSRF26 <sup>T</sup>    | 100.0        |
| <i>Aeb. luteolus</i> SW-109 <sup>T</sup>          | <i>Aeb. luteolus</i> SW-109 <sup>T</sup>    | 100.0        |
|                                                   | <i>Aeb. luteolus</i> SW-109 <sup>T</sup>    | 100.0        |
|                                                   | <i>Aeb. luteolus</i> SW-109 <sup>T</sup>    | 100.0        |
|                                                   | <i>Aeb. luteolus</i> SW-109 <sup>T</sup>    | 100.0        |
| <i>Aeb. marinus</i> H32 <sup>T</sup>              | <i>Aeb. marinus</i> H32 <sup>T</sup>        | 100.0        |

| Genome                                           | Closest type strain                             | Identity (%) |
|--------------------------------------------------|-------------------------------------------------|--------------|
| <i>Aeb. oceanensis</i> MCCC 1A09965 <sup>T</sup> | <i>Aeb. oceanensis</i> Y2 <sup>T</sup>          | 100.0        |
| <i>Aeb. salegens</i> MCCC 1K01500 <sup>T</sup>   | <i>Aeb. salegens</i> XY-R17 <sup>T</sup>        | 100.0        |
| <i>Aeb. sediminis</i> KCTC 42453 <sup>T</sup>    | <i>Aeb. sediminis</i> CAU1172 <sup>T</sup>      | 100.0        |
| <i>Aeb. soli</i> MCCC 1K02066 <sup>T</sup>       | <i>Aeb. soli</i> MN-1 <sup>T</sup>              | 100.0        |
| <i>Aeb. xixiisoli</i> S36 <sup>T</sup>           | <i>Aeb. xixiisoli</i> S36 <sup>T</sup>          | 99.9         |
| <i>Erb. aquimaris</i> JCM 12189 <sup>T</sup>     | <i>Erb. aquimaris</i> SW-110 <sup>T</sup>       | 100.0        |
| <i>Erb. arachoides</i> RC4-10-4 <sup>T</sup>     | <i>Erb. arachoides</i> RC4-10-4 <sup>T</sup>    | 99.3         |
| <i>Erb. citreus</i> CGMCC 1.8703 <sup>T</sup>    | <i>Erb. citreus</i> RE35F/1 <sup>T</sup>        | 100.0        |
|                                                  | <i>Erb. citreus</i> RE35F/1 <sup>T</sup>        | 100.0        |
|                                                  | <i>Erb. citreus</i> RE35F/1 <sup>T</sup>        | 100.0        |
|                                                  | <i>Erb. citreus</i> RE35F/1 <sup>T</sup>        | 100.0        |
| <i>Erb. gaetbuli</i> DSM 16225 <sup>T</sup>      | <i>Erb. gaetbuli</i> SW-161 <sup>T</sup>        | 100.0        |
| <i>Erb. jejuensis</i> JCM 16677 <sup>T</sup>     | <i>Erb. jejuensis</i> CNU001 <sup>T</sup>       | 99.6         |
|                                                  | <i>Erb. jejuensis</i> CNU001 <sup>T</sup>       | 99.6         |
| <i>Erb. pelagi</i> JCM 17468 <sup>T</sup>        | <i>Erb. pelagi</i> JCM 17468 <sup>T</sup>       | 99.8         |
| <i>Erb. vulgaris</i> DSM 17792 <sup>T</sup>      | <i>Erb. vulgaris</i> 022 2-10 <sup>T</sup>      | 100.0        |
| <i>Erm. ramosum</i> JCM 10282 <sup>T</sup>       | <i>Erm. ramosum</i> DSM 8510 <sup>T</sup>       | 100.0        |
| <i>Por. algicida</i> KEMB 9005-328 <sup>T</sup>  | <i>Por. algicida</i> KEMB 9005-328 <sup>T</sup> | 100.0        |

23 Table S4. Annotations of OCs for the phylogenomic analysis assigned to COG and KEGG databases and their best substitutional model.

| Group | Annotation                                                   | COG | KEGG                                                                                                | Best substitutional model |              |
|-------|--------------------------------------------------------------|-----|-----------------------------------------------------------------------------------------------------|---------------------------|--------------|
|       |                                                              |     |                                                                                                     | Nucleotides               | Amino acids  |
| 1     | SSU ribosomal protein S4p (S9e)                              | J   | Ribosome                                                                                            | GTR+F+R5                  | LG+R4        |
| 2     | Queuine tRNA-ribosyltransferase                              | J   | Transfer RNA biogenesis                                                                             | GTR+F+R6                  | LG+F+R5      |
| 3     | S-adenosylmethionine:tRNA ribosyltransferase-isomerase       | J   | Transfer RNA biogenesis                                                                             | TIM3+F+R6                 | LG+F+R5      |
| 4     | Peptidyl-prolyl cis-trans isomerase                          | O   | Necroptosis                                                                                         | GTR+F+R5                  | LG+F+I+G4    |
| 5     | Phosphopantetheine adenylyltransferase                       | H   | Pantothenate and CoA biosynthesis                                                                   | TVM+F+R5                  | LG+R5        |
| 6     | (2E,6E)-farnesyl diphosphate synthase                        | H   | Terpenoid backbone biosynthesis                                                                     | TIM3+F+R5                 | LG+F+R5      |
| 7     | Exodeoxyribonuclease VII small subunit                       | L   | DNA repair and recombination proteins<br>Mismatch repair                                            | TIM3+F+R5                 | Dayhoff+I+G4 |
| 8     | Phosphoribosylformylglycinamide synthase, synthetase subunit | F   | Nucleotide metabolism                                                                               | GTR+F+R6                  | LG+F+R5      |
| 9     | Phosphoserine phosphatase                                    | E   | Amino acid metabolism<br>Energy metabolism                                                          | TIM3+F+R6                 | LG+F+R6      |
| 10    | tRNA dimethylallyltransferase                                | J   | Biosynthesis of secondary metabolites<br>Transfer RNA biogenesis                                    | TVM+F+R6                  | LG+F+I+G4    |
| 11    | Ketol-acid reductoisomerase (NADP(+))                        | E   | Amino acid metabolism<br>Metabolism of cofactors and vitamins                                       | GTR+F+R5                  | LG+R5        |
| 12    | Phosphate transport ATP-binding protein PstB                 | P   | ABC transporters                                                                                    | GTR+F+R5                  | LG+R5        |
| 13    | Phosphate transport system regulatory protein PhoU           | P   | Signaling proteins                                                                                  | GTR+F+R5                  | LG+R4        |
| 14    | Phosphate regulon transcriptional regulatory protein PhoB    | T   | Signaling proteins                                                                                  | GTR+F+R5                  | LG+R5        |
| 15    | Inositol-1-monophosphatase                                   | G   | Inositol phosphate metabolism<br>Phosphatidylinositol signaling system<br>Streptomycin biosynthesis | GTR+F+R6                  | LG+R4        |

| Group | Annotation                                               | COG | KEGG                                                                                       | Best substitution model |             |
|-------|----------------------------------------------------------|-----|--------------------------------------------------------------------------------------------|-------------------------|-------------|
|       |                                                          |     |                                                                                            | Nucleotides             | Amino acids |
| 16    | Translation elongation factor P                          | J   | Translation factors                                                                        | GTR+F+R5                | LG+R3       |
| 17    | Thiamine-phosphate pyrophosphorylase                     | H   | Thiamine metabolism                                                                        | GTR+F+I+G4              | LG+F+R5     |
| 18    | Transketolase                                            | G   | Pentose phosphate pathway                                                                  | GTR+F+R6                | LG+F+R6     |
| 19    | ATP-dependent DNA helicase RecG                          | L   | Homologous recombination                                                                   | GTR+F+R6                | LG+F+R5     |
| 20    | Transcription-repair coupling factor                     | L   | Nucleotide excision repair                                                                 | GTR+F+R6                | LG+F+R5     |
| 21    | NAD kinase                                               | G   | Nicotinate and nicotinamide metabolism                                                     | GTR+F+R5                | LG+I+G4     |
| 22    | Protein translocase subunit SecA                         | U   | Bacterial secretion system<br>Quorum sensing                                               | GTR+F+R6                | LG+F+R6     |
| 23    | Glutamate N-acetyltransferase (EC 2.3.1.35)              | E   | Arginine biosynthesis                                                                      | TIM3+F+R6               | LG+F+R5     |
| 24    | Thioredoxin                                              | O   | Chaperones and folding catalysts                                                           | GTR+F+I+G4              | LG+G4       |
| 25    | Nucleotidyl transferase                                  | M   | Fructose and mannose metabolism                                                            | GTR+F+R6                | LG+R5       |
| 26    | Adenosylhomocysteinase                                   | H   | Cysteine and methionine metabolism                                                         | GTR+F+R6                | LG+F+R5     |
| 27    | Peroxiredoxin                                            | O   | Apoptosis                                                                                  | GTR+F+I+G4              | LG+I+G4     |
| 28    | Excinuclease ABC subunit C                               | L   | Nucleotide excision repair                                                                 | GTR+F+R6                | LG+F+R5     |
| 29    | Translation initiation factor I                          | J   | Translation factors                                                                        | TIM2+F+R5               | LG+R2       |
| 30    | Septum formation protein Maf                             | D   | Signaling proteins                                                                         | GTR+F+R6                | LG+F+R6     |
| 31    | Phosphoribosylaminoimidazole-succinocarboxamide synthase | F   | Purine metabolism                                                                          | GTR+F+I+G4              | LG+R5       |
| 32    | Glutamine-fructose-6-phosphate aminotransferase          | M   | Alanine, aspartate and glutamate metabolism<br>Amino sugar and nucleotide sugar metabolism | GTR+F+R6                | LG+F+R6     |
| 33    | Type II restriction adenine-specific methylase           | L   | Prokaryotic defense system                                                                 | GTR+F+R6                | LG+R6       |
| 34    | Ribonuclease HII                                         | L   | DNA replication                                                                            | GTR+F+R5                | LG+F+R5     |
| 35    | Topoisomerase IV subunit A                               | L   | DNA replication                                                                            | GTR+F+R5                | LG+F+R5     |

| Group | Annotation                                                    | COG | KEGG                                                                                                                                                             | Best substitution model |             |
|-------|---------------------------------------------------------------|-----|------------------------------------------------------------------------------------------------------------------------------------------------------------------|-------------------------|-------------|
|       |                                                               |     |                                                                                                                                                                  | Nucleotides             | Amino acids |
|       |                                                               |     | DNA repair and recombination                                                                                                                                     |                         |             |
| 36    | Ferredoxin, 2Fe-2S                                            | C   | Energy metabolism                                                                                                                                                | TIM3+F+R4               | WAG+I+G4    |
| 37    | Hydrolase SMC00528, alpha/beta fold family                    | S   | Function unknown                                                                                                                                                 | TIM+F+R5                | LG+R4       |
| 38    | DNA-binding response regulator ChvI                           | T   | Signaling proteins                                                                                                                                               | GTR+F+R5                | LG+R6       |
| 39    | PTS system permease (IIAMan), nitrogen regulatory IIA protein | G   | Galactose metabolism<br>Phosphotransferase system                                                                                                                | GTR+F+I+G4              | LG+I+G4     |
| 40    | Phosphocarrier protein, nitrogen regulation associated        | G   | Phosphotransferase system                                                                                                                                        | TPM3u+F+I+G4            | LG+I+G4     |
| 41    | Recombination protein RecR                                    | L   | Homologous recombination                                                                                                                                         | TIM3+F+R5               | LG+R5       |
| 42    | Methionyl-tRNA formyltransferase                              | J   | Aminoacyl-tRNA biosynthesis<br>One carbon pool by folate                                                                                                         | GTR+F+R5                | LG+F+I+G4   |
| 43    | tRNA pseudouridine(38-40) synthase                            | J   | Transfer RNA biogenesis                                                                                                                                          | TVM+F+R5                | WAG+F+R5    |
| 44    | Argininosuccinate lyase                                       | E   | Alanine, aspartate and glutamate metabolism                                                                                                                      | GTR+F+R6                | LG+F+R6     |
| 45    | Diaminopimelate decarboxylase                                 | E   | Lysine biosynthesis                                                                                                                                              | GTR+F+R6                | LG+F+R5     |
| 46    | Adenylosuccinate synthetase                                   | F   | Purine metabolism                                                                                                                                                | GTR+F+R6                | LG+R5       |
| 47    | Replication-associated recombination protein RarA             | L   | DNA replication and repair                                                                                                                                       | GTR+F+R6                | LG+F+R6     |
| 48    | Argininosuccinate synthase                                    | E   | Alanine, aspartate and glutamate metabolism                                                                                                                      | GTR+F+R5                | WAG+R4      |
| 49    | Excinuclease ABC subunit A                                    | L   | Nucleotide excision repair                                                                                                                                       | GTR+F+R6                | LG+R6       |
| 50    | Malate dehydrogenase                                          | C   | Carbon fixation pathways in prokaryotes<br>Citrate cycle<br>Cysteine and methionine metabolism<br>Glyoxylate and dicarboxylate metabolism<br>Pyruvate metabolism | TIM+F+R5                | LG+F+R4     |

| Group | Annotation                                           | COG | KEGG                                                                 | Best substitution model |             |
|-------|------------------------------------------------------|-----|----------------------------------------------------------------------|-------------------------|-------------|
|       |                                                      |     |                                                                      | Nucleotides             | Amino acids |
| 51    | 2-oxoglutarate dehydrogenase E1 component            | C   | Citrate cycle                                                        | GTR+F+R6                | LG+R5       |
| 52    | E2 component of 2-oxoglutarate dehydrogenase complex | C   | Citrate cycle<br>Glycolysis / Gluconeogenesis<br>Pyruvate metabolism | GTR+F+R6                | LG+F+R5     |
| 53    | LSU ribosomal protein L17p                           | J   | Ribosome                                                             | TIM+F+I+G4              | LG+I+G4     |
| 54    | DNA-directed RNA polymerase alpha subunit            | K   | RNA polymerase                                                       | GTR+F+R5                | LG+R4       |
| 55    | SSU ribosomal protein S11p                           | L   | Ribosome                                                             | TIM2+F+I+G4             | LG+R2       |
| 56    | SSU ribosomal protein S13p                           | J   | Ribosome                                                             | TIM2+F+I+G4             | LG+I+G4     |
| 57    | Protein translocase subunit SecY                     | U   | Bacterial secretion system<br>Quorum sensing                         | GTR+F+R6                | LG+F+R5     |
| 58    | LSU ribosomal protein L15p                           | J   | Ribosome                                                             | TIM3+F+I+G4             | WAG+I+G4    |
| 59    | LSU ribosomal protein L30p                           | J   | Ribosome                                                             | GTR+F+I+G4              | LG+R3       |
| 60    | SSU ribosomal protein S5p                            | J   | Ribosome                                                             | TIM3+F+R5               | WAG+F+R4    |
| 61    | LSU ribosomal protein L18p                           | J   | Ribosome                                                             | TN+F+I+G4               | WAG+I+R4    |
| 62    | LSU ribosomal protein L6p                            | J   | Ribosome                                                             | TIM+F+R5                | LG+I+G4     |
| 63    | SSU ribosomal protein S8p                            | J   | Ribosome                                                             | TIM+F+R5                | LG+R3       |
| 64    | SSU ribosomal protein S14p                           | J   | Ribosome                                                             | TIM2+F+I+G4             | LG+R2       |
| 65    | LSU ribosomal protein L5p                            | J   | Ribosome                                                             | GTR+F+R5                | LG+R4       |
| 66    | LSU ribosomal protein L24p                           | J   | Ribosome                                                             | TIM2+F+R4               | LG+G4       |
| 67    | LSU ribosomal protein L14p                           | J   | Ribosome                                                             | TIM2+F+I+G4             | LG+I+G4     |
| 68    | SSU ribosomal protein S17p                           | J   | Ribosome                                                             | TIM+F+I+G4              | WAG+G4      |
| 69    | LSU ribosomal protein L29p                           | J   | Ribosome                                                             | TIM2+F+I+G4             | LG+I+G4     |

| Group | Annotation                                                     | COG | KEGG                                                                  | Best substitution model |              |
|-------|----------------------------------------------------------------|-----|-----------------------------------------------------------------------|-------------------------|--------------|
|       |                                                                |     |                                                                       | Nucleotides             | Amino acids  |
| 70    | LSU ribosomal protein L16                                      | J   | Ribosome                                                              | TIM2+F+R4               | LG+R3        |
| 71    | SSU ribosomal protein S3p                                      | J   | Ribosome                                                              | TIM2+F+R5               | LG+R4        |
| 72    | LSU ribosomal protein L22p                                     | J   | Ribosome                                                              | GTR+F+R5                | LG+I+G4      |
| 73    | SSU ribosomal protein S19p                                     | J   | Ribosome                                                              | GTR+F+R4                | JTDCMut+I+G4 |
| 74    | LSU ribosomal protein L2p                                      | J   | Ribosome                                                              | GTR+F+R5                | LG+R4        |
| 75    | LSU ribosomal protein L23p                                     | J   | Ribosome                                                              | GTR+F+I+G4              | LG+I+G4      |
| 76    | LSU ribosomal protein L4p                                      | J   | Ribosome                                                              | GTR+F+R5                | LG+I+G4      |
| 77    | LSU ribosomal protein L3p                                      | J   | Ribosome                                                              | TIM2+F+R5               | LG+F+R5      |
| 78    | SSU ribosomal protein S10p                                     | J   | Ribosome                                                              | TIM2+F+I+G4             | LG+R2        |
| 79    | Translation elongation factor G                                | J   | Translation factors                                                   | GTR+F+R6                | LG+F+R5      |
| 80    | SSU ribosomal protein S7p                                      | J   | Ribosome                                                              | GTR+F+I+G4              | LG+I+G4      |
| 81    | ApaG protein                                                   | P   | Signaling proteins                                                    | GTR+F+R5                | WAG+F+G4     |
| 82    | RNA binding methyltransferase FtsJ like                        | J   | Ribosome biogenesis                                                   | GTR+F+R6                | LG+F+R6      |
| 83    | 2-keto-3-deoxy-D-arabino-heptulosonate-7-phosphate synthase II | E   | Phenylalanine, tyrosine and tryptophan biosynthesis<br>Quorum sensing | GTR+F+R6                | LG+F+R5      |
| 84    | NifU-like domain protein                                       | O   | Not assigned                                                          | TVM+F+R5                | LG+F+I+G4    |
| 85    | Ferric uptake regulation protein FUR                           | P   | Transcription factors                                                 | GTR+F+R4                | LG+R3        |
| 86    | Metal-dependent hydrolase YbeY                                 | S   | Drug metabolism - other enzymes<br>Pyrimidine metabolism              | TIM3+F+R5               | LG+F+I+G4    |
| 87    | Phosphate starvation-inducible protein PhoH, predicted ATPase  | T   | Signaling proteins                                                    | GTR+F+R5                | LG+R5        |
| 88    | tRNA-i(6)A37 methylthiotransferase                             | J   | Transfer RNA biogenesis                                               | GTR+F+R6                | LG+F+R5      |



| Group | Annotation                                                              | COG | KEGG                                                                          | Best substitution model |             |
|-------|-------------------------------------------------------------------------|-----|-------------------------------------------------------------------------------|-------------------------|-------------|
|       |                                                                         |     |                                                                               | Nucleotides             | Amino acids |
| 89    | A/G-specific adenine glycosylase                                        | L   | Base excision repair                                                          | GTR+F+R6                | WAG+F+R6    |
| 90    | 3-Oxoacyl-[acyl-carrier-protein] synthase, KASIII                       | I   | Fatty acid biosynthesis                                                       | TIM3+F+R6               | LG+I+G4     |
| 91    | Hypothetical metal-binding enzyme, YcbL homolog                         | S   | Pyruvate metabolism                                                           | GTR+F+R5                | LG+R5       |
| 92    | Aerobic cobaltochelate CobT subunit                                     | H   | Porphyrin and chlorophyll metabolism                                          | GTR+F+R6                | LG+F+R5     |
| 93    | ATP synthase alpha chain                                                | C   | Oxidative phosphorylation<br>Photosynthesis                                   | GTR+F+R5                | LG+R5       |
| 94    | ATP synthase gamma chain                                                | C   | Oxidative phosphorylation<br>Photosynthesis                                   | GTR+F+R5                | LG+F+R5     |
| 95    | ATP synthase beta chain                                                 | C   | Oxidative phosphorylation<br>Photosynthesis                                   | GTR+F+R5                | LG+R4       |
| 96    | ATP synthase epsilon chain                                              | C   | Oxidative phosphorylation<br>Photosynthesis                                   | GTR+F+R4                | LG+R4       |
| 97    | <i>N</i> -acetylglucosamine-1-phosphate uridyltransferase               | M   | Amino sugar and nucleotide sugar metabolism                                   | GTR+F+R6                | LG+F+R5     |
| 98    | Octanoate-[acyl-carrier-protein]-protein- <i>N</i> -octanoyltransferase | H   | Lipoic acid metabolism                                                        | GTR+F+R6                | WAG+R5      |
| 99    | Phosphoribosylformylglycinamide cyclo-ligase                            | F   | Purine metabolism                                                             | TIM3+F+R6               | WAG+F+R5    |
| 100   | Nucleoside diphosphate kinase                                           | F   | Drug metabolism - other enzymes<br>Purine metabolism<br>Pyrimidine metabolism | GTR+F+R5                | WAG+I+G4    |
| 101   | Cytosol aminopeptidase PepA                                             | E   | Glutathione metabolism                                                        | GTR+F+R6                | LG+F+R6     |
| 102   | 4-hydroxythreonine-4-phosphate dehydrogenase                            | H   | Vitamin B6 metabolism                                                         | TVM+F+R6                | LG+F+R6     |
| 103   | SSU rRNA (adenine(1518)-N(6)/adenine(1519)-N(6))-dimethyltransferase    | J   | Ribosome biogenesis                                                           | TPM3u+F+R6              | LG+R5       |

| Group | Annotation                                          | COG          | KEGG                                                                                 | Best substitution model |             |
|-------|-----------------------------------------------------|--------------|--------------------------------------------------------------------------------------|-------------------------|-------------|
|       |                                                     |              |                                                                                      | Nucleotides             | Amino acids |
| 104   | GTP-binding protein TypA/BipA                       | T            | Signaling proteins                                                                   | GTR+F+R5                | LG+R5       |
| 105   | Excinuclease ABC subunit B                          | L            | Nucleotide excision repair                                                           | GTR+F+R6                | LG+F+R5     |
| 106   | N(6)-L-threonylcarbamoyladenine synthase            | O            | Transfer RNA biogenesis                                                              | GTR+F+R6                | LG+F+R5     |
| 107   | Glycerol-3-phosphate dehydrogenase [NAD(P)+]        | C            | Glycerophospholipid metabolism                                                       | TVM+F+R6                | LG+F+R5     |
| 108   | Hypothetical protein                                | S            | Not assigned                                                                         | TIM3+F+I+G4             | LG+G4       |
| 109   | Hypothetical protein                                | Not assigned | Not assigned                                                                         | TN+F+R5                 | LG+G4       |
| 110   | Ribosomal protein S12p Asp88 methylthiotransferase  | J            | Ribosome biogenesis                                                                  | GTR+F+R6                | LG+F+R5     |
| 111   | 5'-nucleotidase SurE                                | F            | Nicotinate and nicotinamide metabolism<br>Purine metabolism<br>Pyrimidine metabolism | GTR+F+R5                | LG+R5       |
| 112   | Seryl-tRNA synthetase                               | J            | Aminoacyl-tRNA biosynthesis                                                          | GTR+F+R6                | LG+F+R5     |
| 113   | Aspartate carbamoyltransferase                      | F            | Alanine, aspartate and glutamate metabolism<br>Pyrimidine metabolism                 | GTR+F+R5                | WAG+F+R5    |
| 114   | ATP-dependent Clp protease proteolytic subunit      | O            | Cell cycle                                                                           | GTR+F+R5                | LG+R5       |
| 115   | ATP-dependent Clp protease ATP-binding subunit ClpX | O            | Cell cycle                                                                           | GTR+F+R5                | LG+R4       |
| 116   | Ribosomal large subunit pseudouridine synthase D    | J            | Ribosome biogenesis                                                                  | TVM+F+R5                | LG+F+R6     |
| 117   | <i>N</i> -acetylmuramoyl-L-alanine amidase          | M            | Unclassified: metabolism                                                             | GTR+F+R6                | LG+F+R5     |
| 118   | Sulfite exporter TauE/SafE                          | S            | Function unknown                                                                     | TVM+F+R5                | LG+F+R5     |
| 119   | Valyl-tRNA synthetase                               | J            | Aminoacyl-tRNA biosynthesis                                                          | GTR+F+R6                | LG+F+R6     |
| 120   | Ribosomal large subunit pseudouridine synthase C    | J            | Ribosome biogenesis                                                                  | GTR+F+R6                | LG+F+R5     |
| 121   | SSU ribosomal protein S21p                          | J            | Ribosome                                                                             | GTR+F+I+G4              | LG+R2       |

| Group | Annotation                                         | COG | KEGG                                                                                                                                   | Best substitution model |             |
|-------|----------------------------------------------------|-----|----------------------------------------------------------------------------------------------------------------------------------------|-------------------------|-------------|
|       |                                                    |     |                                                                                                                                        | Nucleotides             | Amino acids |
| 122   | Aspartyl-tRNA(Asn) amidotransferase subunit C      | J   | Aminoacyl-tRNA biosynthesis                                                                                                            | GTR+F+R5                | WAG+G4      |
| 123   | Aspartyl-tRNA(Asn) amidotransferase subunit A      | J   | Aminoacyl-tRNA biosynthesis                                                                                                            | GTR+F+R6                | LG+F+R6     |
| 124   | Aspartyl-tRNA(Asn) amidotransferase subunit B      | J   | Aminoacyl-tRNA biosynthesis                                                                                                            | GTR+F+R5                | LG+F+R5     |
| 125   | ClpB protein                                       | O   | Chaperones and folding catalysts                                                                                                       | GTR+F+R6                | LG+F+R5     |
| 126   | Ribonuclease HI                                    | L   | DNA replication                                                                                                                        | TIM3+F+I+G4             | LG+I+G4     |
| 127   | 4-hydroxy-3-methylbut-2-enyl diphosphate reductase | I   | Terpenoid backbone biosynthesis                                                                                                        | GTR+F+R5                | LG+R5       |
| 128   | Arginyl-tRNA synthetase                            | J   | Aminoacyl-tRNA biosynthesis                                                                                                            | GTR+F+R6                | LG+F+R6     |
| 129   | beta-N-acetylglucosaminidase                       | G   | Amino sugar and nucleotide sugar metabolism<br>Glycosaminoglycan degradation                                                           | TIM3+F+R6               | LG+F+R6     |
| 130   | Twin-arginine translocation protein TatC           | U   | Protein export                                                                                                                         | TPM3u+F+R5              | LG+R6       |
| 131   | Threonine dehydratase, catabolic                   | E   | Glycine, serine and threonine metabolism                                                                                               | GTR+F+R6                | LG+R6       |
| 132   | Glutamine synthetase type I                        | E   | Alanine, aspartate and glutamate metabolism<br>Arginine biosynthesis<br>Glyoxylate and dicarboxylate metabolism<br>Nitrogen metabolism | GTR+F+R5                | LG+R4       |
| 133   | Nitrogen regulatory protein P-II                   | E   | Two-component system                                                                                                                   | TVM+F+I+G4              | LG+I+G4     |
| 134   | Peptidase B                                        | E   | Glutathione metabolism                                                                                                                 | TIM3+F+R6               | LG+F+I+G4   |
| 135   | Methionine aminopeptidase                          | J   | Peptidases and inhibitors                                                                                                              | GTR+F+R5                | LG+I+G4     |
| 136   | Pterin-4-alpha-carbinolamine dehydratase           | H   | Folate biosynthesis                                                                                                                    | TIM3+F+R5               | WAG+G4      |
| 137   | 16S rRNA (cytosine(1402)-N(4))-methyltransferase   | M   | Ribosome biogenesis                                                                                                                    | TIM3+F+R5               | LG+F+I+G4   |
| 138   | Phospho-N-acetylmuramoyl-pentapeptide-transferase  | M   | Peptidoglycan biosynthesis                                                                                                             | GTR+F+R6                | LG+F+R4     |
| 139   | UDP-N-acetylmuramate--L-alanine ligase             | M   | D-Glutamine and D-glutamate metabolism                                                                                                 | GTR+F+R6                | LG+F+R6     |

| Group | Annotation                                                | COG | KEGG                                                                                                               | Best substitution model |             |
|-------|-----------------------------------------------------------|-----|--------------------------------------------------------------------------------------------------------------------|-------------------------|-------------|
|       |                                                           |     |                                                                                                                    | Nucleotides             | Amino acids |
|       |                                                           |     | Peptidoglycan biosynthesis                                                                                         |                         |             |
| 140   | UDP- <i>N</i> -acetylenolpyruvoylglucosamine reductase    | M   | Amino sugar and nucleotide sugar metabolism<br>Peptidoglycan biosynthesis                                          | GTR+F+R5                | LG+R5       |
| 141   | GTP-binding protein Obg                                   | S   | Ribosome biogenesis                                                                                                | GTR+F+R6                | LG+F+R5     |
| 142   | Aerobic cobaltochelataze CobS subunit                     | H   | Porphyrin and chlorophyll metabolism                                                                               | GTR+F+R5                | LG+R5       |
| 143   | Putative pre-16S rRNA nuclease Yqg                        | L   | Unclassified: metabolism                                                                                           | TIM3+F+R5               | LG+F+I+G4   |
| 144   | Pyridoxine 5'-phosphate synthase                          | H   | Vitamin B6 metabolism                                                                                              | GTR+F+R6                | LG+R4       |
| 145   | Threonine synthase                                        | E   | Glycine, serine and threonine metabolism<br>Vitamin B6 metabolism                                                  | GTR+F+R6                | LG+F+R6     |
| 146   | LSU ribosomal protein L27p                                | J   | Ribosome                                                                                                           | TIM+F+I+G4              | DCMut+G4    |
| 147   | Glutamate--cysteine ligase                                | H   | Cysteine and methionine metabolism<br>Glutathione metabolism                                                       | GTR+F+R6                | LG+R5       |
| 148   | Lysyl-tRNA synthetase (class I)                           | J   | Aminoacyl-tRNA biosynthesis                                                                                        | GTR+F+R5                | LG+F+R5     |
| 149   | Energy-dependent translational throttle protein EttA      | S   | Transfer RNA biogenesis                                                                                            | GTR+F+R5                | LG+R5       |
| 150   | Transcriptional regulator, AsnC family                    | K   | Transcription factors                                                                                              | GTR+F+R5                | LG+R4       |
| 151   | Biotin carboxylase of acetyl-CoA carboxylase              | I   | Carbon fixation pathways in prokaryotes<br>Fatty acid biosynthesis<br>Propanoate metabolism<br>Pyruvate metabolism | GTR+F+R5                | LG+R5       |
| 152   | Biotin carboxyl carrier protein of acetyl-CoA carboxylase | I   | Carbon fixation pathways in prokaryotes<br>Fatty acid biosynthesis<br>Propanoate metabolism                        | TIM3+F+R6               | LG+F+R5     |

| Group | Annotation                                                              | COG | KEGG                                                           | Best substitution model |             |
|-------|-------------------------------------------------------------------------|-----|----------------------------------------------------------------|-------------------------|-------------|
|       |                                                                         |     |                                                                | Nucleotides             | Amino acids |
|       |                                                                         |     | Pyruvate metabolism                                            |                         |             |
| 153   | Two-component transcriptional response regulator, LuxR family           | T   | Two-component system                                           | TIM+F+R5                | WAG+R4      |
| 154   | Decaprenyl diphosphate synthase                                         | H   | Terpenoid backbone biosynthesis                                | GTR+F+R5                | LG+F+R6     |
| 155   | DNA polymerase III subunits gamma and tau                               | L   | DNA replication<br>Homologous recombination<br>Mismatch repair | GTR+F+R7                | LG+F+R6     |
| 156   | ATP-dependent protease La Type I                                        | O   | Cell cycle                                                     | GTR+F+R6                | LG+F+R5     |
| 157   | DNA-binding protein HU-beta                                             | L   | DNA replication                                                | GTR+F+I+G4              | Dayhoff+G4  |
| 158   | SSU ribosomal protein S2p                                               | J   | Ribosome                                                       | TIM+F+R5                | LG+R4       |
| 159   | Translation elongation factor Ts                                        | J   | Translation factors                                            | TIM2+F+R6               | LG+F+R4     |
| 160   | Uridine monophosphate kinase                                            | F   | Pyrimidine metabolism                                          | GTR+F+R5                | LG+R5       |
| 161   | Ribosome recycling factor                                               | J   | Translation factors                                            | GTR+F+R5                | LG+I+G4     |
| 162   | Undecaprenyl diphosphate synthase                                       | I   | Terpenoid backbone biosynthesis                                | TIM3+F+I+G4             | LG+F+R6     |
| 163   | 1-deoxy-D-xylulose 5-phosphate reductoisomerase                         | I   | Terpenoid backbone biosynthesis                                | GTR+F+R6                | LG+F+R6     |
| 164   | 3-hydroxyacyl-[acyl-carrier-protein] dehydratase, FabZ form             | I   | Biotin metabolism<br>Fatty acid biosynthesis                   | GTR+F+R5                | LG+I+G4     |
| 165   | LSU ribosomal protein L31p                                              | J   | Ribosome                                                       | TIM+F+I+G4              | WAG+G4      |
| 166   | Cytochrome c-type biogenesis protein CcmC, putative heme lyase for CcmE | O   | ABC transporters                                               | TVM+F+R5                | mtZOA+F+R6  |
| 167   | Signal recognition particle receptor FtsY                               | U   | Protein export<br>Quorum sensing                               | GTR+F+R5                | LG+R4       |
| 168   | Diaminopimelate epimerase                                               | E   | Lysine biosynthesis                                            | GTR+F+R6                | LG+F+R6     |

| Group | Annotation                                                         | COG | KEGG                                                                             | Best substitution model |             |
|-------|--------------------------------------------------------------------|-----|----------------------------------------------------------------------------------|-------------------------|-------------|
|       |                                                                    |     |                                                                                  | Nucleotides             | Amino acids |
| 169   | CDP-diacylglycerol--glycerol-3-phosphate 3-phosphatidyltransferase | I   | Glycerophospholipid metabolism                                                   | TVM+F+R6                | LG+F+I+G4   |
| 170   | Aspartyl-tRNA synthetase                                           | J   | Aminoacyl-tRNA biosynthesis                                                      | GTR+F+R6                | LG+R6       |
| 171   | Acyl carrier protein                                               | I   | Fatty acid biosynthesis                                                          | TIM2+F+I+G4             | JTTDCMut+G4 |
| 172   | 3-oxoacyl-[acyl-carrier-protein] synthase, KASII                   | I   | Biotin metabolism<br>Fatty acid biosynthesis                                     | GTR+F+R6                | LG+R5       |
| 173   | Thioredoxin reductase                                              | O   | Selenocompound metabolism                                                        | GTR+F+R6                | WAG+R5      |
| 174   | Psp operon transcriptional activator                               | K   | Transcription factors                                                            | GTR+F+R6                | LG+F+R6     |
| 175   | 5-aminolevulinate synthase                                         | H   | Glycine, serine and threonine metabolism<br>Porphyrin and chlorophyll metabolism | GTR+F+R6                | LG+R4       |
| 176   | Acyl-phosphate:glycerol-3-phosphate O-acyltransferase PlsY         | S   | Glycerolipid metabolism<br>Glycerophospholipid metabolism                        | GTR+F+R5                | LG+F+R5     |
| 177   | DNA topoisomerase I                                                | L   | NA repair and recombination<br>DNA replication                                   | GTR+F+R7                | LG+F+R5     |
| 178   | GTP-binding protein Era                                            | K   | Ribosome biogenesis                                                              | GTR+F+R6                | LG+R5       |
| 179   | ATP-dependent RNA helicase RhIE                                    | L   | RNA degradation                                                                  | GTR+F+R6                | LG+F+R5     |
| 180   | 3-dehydroquinate synthase                                          | E   | Phenylalanine, tyrosine and tryptophan biosynthesis                              | GTR+F+R6                | LG+F+R6     |
| 181   | Shikimate kinase I                                                 | E   | Phenylalanine, tyrosine and tryptophan biosynthesis                              | TPM3+F+R5               | LG+F+I+G4   |
| 182   | Site-specific tyrosine recombinase XerD                            | L   | Chromosome and associated proteins                                               | TVM+F+R6                | LG+F+R5     |
| 183   | Acetyl-coenzyme A carboxyl transferase alpha chain                 | I   | Carbon fixation pathways in prokaryotes<br>Fatty acid biosynthesis               | TIM3+F+R5               | LG+R5       |

| Group | Annotation                                        | COG | KEGG                                                                                             | Best substitution model |             |
|-------|---------------------------------------------------|-----|--------------------------------------------------------------------------------------------------|-------------------------|-------------|
|       |                                                   |     |                                                                                                  | Nucleotides             | Amino acids |
|       |                                                   |     | Propanoate metabolism<br>Pyruvate metabolism                                                     |                         |             |
| 184   | Transcription termination protein NusA            | K   | Transcription machinery                                                                          | GTR+F+R6                | LG+R5       |
| 185   | 23S rRNA (adenine(2503)-C(2))-methyltransferase   | J   | Ribosome biogenesis                                                                              | GTR+F+R6                | LG+F+R5     |
| 186   | Translation initiation factor 2                   | J   | Translation factors                                                                              | GTR+F+R6                | LG+F+R6     |
| 187   | 4-hydroxy-tetrahydrodipicolinate synthase         | E   | Lysine biosynthesis<br>Monobactam biosynthesis                                                   | GTR+F+R6                | LG+I+G4     |
| 188   | tmRNA-binding protein SmpB                        | O   | Unclassified: genetic information processing                                                     | TIM+F+R5                | LG+R4       |
| 189   | RecA protein                                      | L   | Homologous recombination                                                                         | GTR+F+R5                | LG+I+G4     |
| 190   | Alanyl-tRNA synthetase                            | J   | Aminoacyl-tRNA biosynthesis                                                                      | GTR+F+R6                | LG+F+R5     |
| 191   | Isocitrate dehydrogenase [NADP]                   | C   | Carbon fixation pathways in prokaryotes<br>Citrate cycle<br>Glutathione metabolism<br>Peroxisome | GTR+F+R5                | LG+R5       |
| 192   | ATP-dependent RNA helicase Atu1833                | L   | RNA degradation                                                                                  | GTR+F+R6                | LG+F+R6     |
| 193   | ATP-dependent DNA helicase UvrD/PcrA              | L   | Mismatch repair<br>Nucleotide excision repair                                                    | GTR+F+R6                | LG+F+R6     |
| 194   | Ribosomal large subunit pseudouridine synthase B  | J   | Ribosome biogenesis                                                                              | GTR+F+R5                | LG+R5       |
| 195   | Ribosome-binding factor A                         | J   | Ribosome biogenesis                                                                              | GTR+F+R5                | LG+R4       |
| 196   | Acetyl-coenzyme A carboxyl transferase beta chain | H   | Carbon fixation pathways in prokaryotes<br>Fatty acid biosynthesis<br>Propanoate metabolism      | GTR+F+R6                | LG+I+G4     |

| Group | Annotation                                   | COG | KEGG                                                                                            | Best substitution model |             |
|-------|----------------------------------------------|-----|-------------------------------------------------------------------------------------------------|-------------------------|-------------|
|       |                                              |     |                                                                                                 | Nucleotides             | Amino acids |
|       |                                              |     | Pyruvate metabolism                                                                             |                         |             |
| 197   | Tryptophan synthase alpha chain              | E   | Glycine, serine and threonine metabolism<br>Phenylalanine, tyrosine and tryptophan biosynthesis | GTR+F+R5                | WAG+R5      |
| 198   | Tryptophan synthase beta chain               | E   | Glycine, serine and threonine metabolism<br>Phenylalanine, tyrosine and tryptophan biosynthesis | GTR+F+R5                | LG+R5       |
| 199   | Phosphoribosylanthranilate isomerase         | E   | Phenylalanine, tyrosine and tryptophan biosynthesis                                             | TVM+F+R5                | LG+I+G4     |
| 200   | Orotidine 5'-phosphate decarboxylase         | F   | Pyrimidine metabolism                                                                           | GTR+F+R5                | LG+R5       |
| 201   | Adenylosuccinate lyase                       | F   | Alanine, aspartate and glutamate metabolism<br>Purine metabolism                                | GTR+F+R6                | LG+F+R5     |
| 202   | Hydroxyacylglutathione hydrolase             | C   | Pyruvate metabolism                                                                             | TIM3+F+R6               | WAG+I+R4    |
| 203   | SSU ribosomal protein S1p                    | J   | Ribosome                                                                                        | TIM+F+R5                | LG+F+R5     |
| 204   | Cytidylate kinase                            | F   | beta-Alanine metabolism<br>Pyrimidine metabolism<br>Pantothenate and CoA biosynthesis           | GTR+F+R5                | WAG+F+R5    |
| 205   | 3-phosphoshikimate 1-carboxyvinyltransferase | E   | Novobiocin biosynthesis<br>Phenylalanine, tyrosine and tryptophan biosynthesis                  | GTR+F+R6                | LG+F+R6     |
| 206   | Signal recognition particle protein Ffh      | U   | Protein export<br>Quorum sensing                                                                | GTR+F+R6                | LG+F+R5     |
| 207   | tRNA (guanine(37)-N(1))-methyltransferase    | J   | Transfer RNA biogenesis                                                                         | GTR+F+R6                | LG+I+G4     |



| Group | Annotation                                    | COG | KEGG                                                                                                                             | Best substitution model |             |
|-------|-----------------------------------------------|-----|----------------------------------------------------------------------------------------------------------------------------------|-------------------------|-------------|
|       |                                               |     |                                                                                                                                  | Nucleotides             | Amino acids |
| 208   | LSU ribosomal protein L19p                    | J   | Ribosome                                                                                                                         | GTR+F+I+G4              | LG+I+G4     |
| 209   | Aspartate-semialdehyde dehydrogenase          | E   | Cysteine and methionine metabolism<br>Glycine, serine and threonine metabolism<br>Lysine biosynthesis<br>Monobactam biosynthesis | GTR+F+R6                | LG+R5       |
| 210   | LSU ribosomal protein L9p                     | J   | Ribosome                                                                                                                         | GTR+F+R5                | LG+F+I+G4   |
| 211   | SSU ribosomal protein S18p                    | J   | Ribosome                                                                                                                         | TIM2+F+I+G4             | rtREV+R3    |
| 212   | SSU ribosomal protein S6p                     | J   | Ribosome                                                                                                                         | TIM+F+I+G4              | LG+R3       |
| 213   | Malonyl CoA-acyl carrier protein transacylase | I   | Fatty acid biosynthesis<br>Prodigiosin biosynthesis                                                                              | TIM3+F+R5               | LG+F+R5     |
| 214   | 3-oxoacyl-[acyl-carrier protein] reductase    | I   | Biotin metabolism<br>Fatty acid biosynthesis<br>Prodigiosin biosynthesis                                                         | GTR+F+R5                | LG+R4       |
| 215   | DNA polymerase III beta subunit               | L   | DNA replication<br>Homologous recombination<br>Mismatch repair                                                                   | GTR+F+R5                | LG+F+R5     |
| 216   | Translation elongation factor LepA            | M   | Legionellosis                                                                                                                    | GTR+F+R6                | LG+R5       |
| 217   | Competence lipoprotein ComL                   | M   | Transporters                                                                                                                     | GTR+F+R5                | LG+I+G4     |
| 218   | SSU ribosomal protein S15p                    | J   | Ribosome                                                                                                                         | GTR+F+I+G4              | WAG+I+G4    |
| 219   | DNA repair protein RecN                       | L   | DNA repair and recombination                                                                                                     | GTR+F+R6                | LG+F+R5     |
| 220   | DNA ligase (NAD(+))                           | L   | Base excision repair<br>DNA replication                                                                                          | GTR+F+R6                | LG+F+R6     |

| Group | Annotation                                                       | COG | KEGG                                                                                                          | Best substitution model |             |
|-------|------------------------------------------------------------------|-----|---------------------------------------------------------------------------------------------------------------|-------------------------|-------------|
|       |                                                                  |     |                                                                                                               | Nucleotides             | Amino acids |
|       |                                                                  |     | Mismatch repair<br>Nucleotide excision repair                                                                 |                         |             |
| 221   | Polyribonucleotide nucleotidyltransferase                        | J   | RNA degradation                                                                                               | GTR+F+R6                | LG+F+R5     |
| 222   | Succinate dehydrogenase flavoprotein subunit                     | C   | Butanoate metabolism<br>Carbon fixation pathways in prokaryotes<br>Citrate cycle<br>Oxidative phosphorylation | TIM3+F+R5               | LG+R5       |
| 223   | Inosine-5'-monophosphate dehydrogenase                           | F   | Drug metabolism - other enzymes<br>Purine metabolism                                                          | GTR+F+R6                | LG+F+R5     |
| 224   | Adenosine (5')-pentaphospho-(5'')-adenosine pyrophosphohydrolase | J   | RNA degradation                                                                                               | TIM3+F+R5               | LG+I+R4     |
| 225   | Amidophosphoribosyltransferase                                   | F   | Alanine, aspartate and glutamate metabolism<br>Purine metabolism                                              | GTR+F+R6                | LG+R5       |
| 226   | Lipoprotein-releasing system ATP-binding protein Lold            | P   | Transporters                                                                                                  | TIM3+F+R5               | LG+I+G4     |
| 227   | DNA polymerase III alpha subunit                                 | L   | DNA replication<br>Homologous recombination<br>Mismatch repair                                                | GTR+F+R6                | LG+F+R6     |
| 228   | Succinate dehydrogenase iron-sulfur protein                      | C   | Butanoate metabolism<br>Carbon fixation pathways in prokaryotes<br>Citrate cycle<br>Oxidative phosphorylation | GTR+F+R6                | LG+R4       |
| 229   | GTP-binding and nucleic acid-binding protein YchF                | J   | Ribosome biogenesis                                                                                           | GTR+F+R5                | LG+F+R5     |
| 230   | Hypothetical protein                                             | S   | Chromosome and associated proteins                                                                            | TVM+F+I+G4              | LG+I+G4     |
| 231   | Peptidyl-tRNA hydrolase                                          | J   | Translation factors                                                                                           | GTR+F+R5                | LG+R5       |

| Group | Annotation                                                       | COG | KEGG                                                                                                                                                              | Best substitution model |             |
|-------|------------------------------------------------------------------|-----|-------------------------------------------------------------------------------------------------------------------------------------------------------------------|-------------------------|-------------|
|       |                                                                  |     |                                                                                                                                                                   | Nucleotides             | Amino acids |
| 232   | Glycyl-tRNA synthetase alpha chain                               | J   | Aminoacyl-tRNA biosynthesis                                                                                                                                       | GTR+F+R5                | WAG+R4      |
| 233   | Cysteine synthase                                                | E   | Cysteine and methionine metabolism<br>Sulfur metabolism                                                                                                           | GTR+F+R6                | LG+R5       |
| 234   | Tyrosyl-tRNA synthetase                                          | J   | Aminoacyl-tRNA biosynthesis                                                                                                                                       | GTR+F+R6                | LG+F+R6     |
| 235   | Topoisomerase IV subunit B                                       | L   | DNA repair and recombination<br>DNA replication                                                                                                                   | GTR+F+R6                | LG+R5       |
| 236   | 16S rRNA (cytidine(1402)-2'-O)-methyltransferase                 | S   | Ribosome biogenesis                                                                                                                                               | GTR+F+R5                | LG+F+I+G4   |
| 237   | Glutathione synthetase                                           | H   | Cysteine and methionine metabolism<br>Glutathione metabolism                                                                                                      | GTR+F+R5                | LG+R5       |
| 238   | Radical SAM family enzyme                                        | H   | Porphyrin and chlorophyll metabolism                                                                                                                              | GTR+F+R6                | LG+F+R5     |
| 239   | Nucleoside 5-triphosphatase RdgB (dHAPTP, dITP, XTP-specific)    | F   | Purine metabolism                                                                                                                                                 | TIM3+F+R5               | LG+F+R4     |
| 240   | Ribonuclease PH                                                  | J   | Transfer RNA biogenesis                                                                                                                                           | GTR+F+R5                | LG+R4       |
| 241   | Chaperone protein DnaK                                           | O   | RNA degradation                                                                                                                                                   | GTR+F+R6                | LG+F+R5     |
| 242   | Chaperone protein DnaJ                                           | O   | Chaperones and folding catalysts<br>Mitochondrial biogenesis                                                                                                      | GTR+F+R5                | LG+F+R5     |
| 243   | DNA repair protein RadA                                          | O   | DNA repair and recombination                                                                                                                                      | TIM3+F+R6               | LG+F+R5     |
| 244   | Dihydrolipoamide dehydrogenase of pyruvate dehydrogenase complex | C   | Citrate cycle<br>Glycine, serine and threonine metabolism<br>Glycolysis<br>Glyoxylate and dicarboxylate metabolism<br>Lysine degradation<br>Propanoate metabolism | GTR+F+R5                | LG+F+R5     |

| Group | Annotation                                                          | COG | KEGG                                                                                         | Best substitution model |             |
|-------|---------------------------------------------------------------------|-----|----------------------------------------------------------------------------------------------|-------------------------|-------------|
|       |                                                                     |     |                                                                                              | Nucleotides             | Amino acids |
|       |                                                                     |     | Pyruvate metabolism<br>Tryptophan metabolism<br>Valine, leucine and isoleucine degradation   |                         |             |
| 245   | Methionyl-tRNA synthetase                                           | J   | Aminoacyl-tRNA biosynthesis<br>Selenocompound metabolism                                     | GTR+F+R6                | LG+F+R6     |
| 246   | Uncharacterized metal-dependent hydrolase YcfH                      | L   | Unclassified: metabolism                                                                     | TIM3+F+R6               | LG+F+R5     |
| 247   | Nucleoside triphosphate pyrophosphohydrolase MazG                   | F   | Chromosome and associated proteins                                                           | GTR+F+R6                | LG+F+R6     |
| 248   | Ribosome LSU-associated GTP-binding protein HflX                    | S   | Ribosome biogenesis                                                                          | TIM3+F+R6               | LG+F+R6     |
| 249   | Nitrogen regulation protein NtrX                                    | T   | Two-component system                                                                         | GTR+F+R6                | LG+F+R6     |
| 250   | tRNA-dihydrouridine synthase DusB                                   | J   | Transfer RNA biogenesis                                                                      | GTR+F+R6                | LG+F+R5     |
| 251   | 2-C-methyl-D-erythritol 4-phosphate cytidylyltransferase            | I   | Terpenoid backbone biosynthesis                                                              | GTR+F+R7                | WAG+F+R6    |
| 252   | Nicotinamide-nucleotide amidase                                     | S   | Nicotinate and nicotinamide metabolism                                                       | TVM+F+R5                | LG+R4       |
| 253   | Lipoyl synthase                                                     | H   | Lipoic acid metabolism                                                                       | GTR+F+R9                | LG+R5       |
| 254   | DNA gyrase subunit A                                                | L   | DNA repair and recombination<br>DNA replication                                              | GTR+F+R6                | LG+F+R6     |
| 255   | Methylenetetrahydrofolate--tRNA-(uracil-5-)-methyltransferase TrmFO | J   | Transfer RNA biogenesis                                                                      | GTR+F+R6                | LG+F+R5     |
| 256   | Glutaredoxin 3 (Grx2)                                               | O   | Chaperones and folding catalysts                                                             | GTR+F+I+G4              | WAG+I+G4    |
| 257   | 16 kDa heat shock protein A                                         | O   | Chaperones and folding catalysts                                                             | GTR+F+R5                | LG+R5       |
| 258   | CTP synthase                                                        | F   | Pyrimidine metabolism                                                                        | GTR+F+R6                | LG+F+R5     |
| 259   | Triosephosphate isomerase                                           | G   | Carbon fixation in photosynthetic organisms<br>Fructose and mannose metabolism<br>Glycolysis | TIM3+F+R6               | LG+F+R5     |

| Group | Annotation                                        | COG | KEGG                                                                                            | Best substitution model |             |
|-------|---------------------------------------------------|-----|-------------------------------------------------------------------------------------------------|-------------------------|-------------|
|       |                                                   |     |                                                                                                 | Nucleotides             | Amino acids |
|       |                                                   |     | Inositol phosphate metabolism                                                                   |                         |             |
| 260   | Anthranilate synthase, aminase component          | E   | Phenazine biosynthesis<br>Phenylalanine, tyrosine and tryptophan biosynthesis<br>Quorum sensing | GTR+F+R6                | WAG+F+R6    |
| 261   | Anthranilate synthase, amidotransferase component | E   | Phenazine biosynthesis<br>Phenylalanine, tyrosine and tryptophan biosynthesis<br>Quorum sensing | GTR+F+R5                | WAG+I+G4    |
| 262   | Anthranilate phosphoribosyltransferase            | E   | Phenylalanine, tyrosine and tryptophan biosynthesis                                             | GTR+F+R5                | LG+F+R5     |
| 263   | Indole-3-glycerol phosphate synthase              | E   | Phenylalanine, tyrosine and tryptophan biosynthesis                                             | TIM3+F+R5               | LG+F+I+G4   |
| 264   | SOS-response repressor and protease LexA          | K   | DNA repair and recombination<br>Peptidases and inhibitors                                       | GTR+F+R6                | LG+R5       |
| 265   | Glutamyl-tRNA synthetase                          | J   | Aminoacyl-tRNA biosynthesis<br>Porphyrin and chlorophyll metabolism                             | TIM3+F+R6               | LG+f+R5     |
| 266   | Pantothenate kinase type III, CoaX-like           | K   | Pantothenate and CoA biosynthesis                                                               | GTR+F+R6                | LG+R5       |
| 267   | NADH-ubiquinone oxidoreductase chain N            | C   | Oxidative phosphorylation                                                                       | TVM+F+R6                | LG+F+R5     |
| 268   | NADH-ubiquinone oxidoreductase chain M            | C   | Oxidative phosphorylation                                                                       | GTR+F+R6                | LG+F+R5     |
| 269   | NADH-ubiquinone oxidoreductase chain L            | C   | Oxidative phosphorylation                                                                       | GTR+F+R6                | LG+F+R5     |
| 270   | NADH-ubiquinone oxidoreductase chain K            | C   | Oxidative phosphorylation                                                                       | TVM+F+I+G4              | mtZOA+R4    |

| Group | Annotation                             | COG | KEGG                                                                                                                                                                                                                                                                                                                                                                                       | Best substitution model |             |
|-------|----------------------------------------|-----|--------------------------------------------------------------------------------------------------------------------------------------------------------------------------------------------------------------------------------------------------------------------------------------------------------------------------------------------------------------------------------------------|-------------------------|-------------|
|       |                                        |     |                                                                                                                                                                                                                                                                                                                                                                                            | Nucleotides             | Amino acids |
| 271   | NADH-ubiquinone oxidoreductase chain J | C   | Oxidative phosphorylation                                                                                                                                                                                                                                                                                                                                                                  | TVM+F+R5                | LG+I+G4     |
| 272   | NADH-ubiquinone oxidoreductase chain I | C   | Oxidative phosphorylation                                                                                                                                                                                                                                                                                                                                                                  | GTR+F+R5                | LG+R3       |
| 273   | NADH-ubiquinone oxidoreductase chain H | C   | Oxidative phosphorylation                                                                                                                                                                                                                                                                                                                                                                  | TIM+F+R6                | LG+F+R5     |
| 274   | NADH-ubiquinone oxidoreductase chain G | C   | Oxidative phosphorylation                                                                                                                                                                                                                                                                                                                                                                  | GTR+F+R6                | LG+F+R5     |
| 275   | NADH-ubiquinone oxidoreductase chain F | C   | Oxidative phosphorylation                                                                                                                                                                                                                                                                                                                                                                  | GTR+F+R6                | LG+R4       |
| 276   | NADH-ubiquinone oxidoreductase chain D | C   | Oxidative phosphorylation                                                                                                                                                                                                                                                                                                                                                                  | GTR+F+R6                | LG+R4       |
| 277   | NADH-ubiquinone oxidoreductase chain C | C   | Oxidative phosphorylation                                                                                                                                                                                                                                                                                                                                                                  | GTR+F+R6                | WAG+I+G4    |
| 278   | NADH-ubiquinone oxidoreductase chain B | C   | Oxidative phosphorylation                                                                                                                                                                                                                                                                                                                                                                  | TIM+F+R5                | JTTDCMut+R5 |
| 279   | 3-ketoacyl-CoA thiolase                | I   | Benzoate degradation<br>Butanoate metabolism<br>Carbon fixation pathways in prokaryotes<br>Fatty acid degradation<br>Glyoxylate and dicarboxylate metabolism<br>Lysine degradation<br>Propanoate metabolism<br>Pyruvate metabolism<br>Synthesis and degradation of ketone bodies<br>Terpenoid backbone biosynthesis<br>Tryptophan metabolism<br>Valine, leucine and isoleucine degradation | GTR+F+R6                | LG+F+R5     |
| 280   | Peptide chain release factor 2         | J   | Translation factors                                                                                                                                                                                                                                                                                                                                                                        | TIM+F+R5                | LG+F+R5     |
| 281   | DNA mismatch repair protein MutL       | L   | Mismatch repair                                                                                                                                                                                                                                                                                                                                                                            | TIM3+F+R6               | LG+F+R6     |
| 282   | Rod shape-determining protein MreB     | D   | Chromosome and associated proteins                                                                                                                                                                                                                                                                                                                                                         | GTR+F+R5                | LG+R4       |

| Group | Annotation                               | COG | KEGG                                                                 | Best substitution model |             |
|-------|------------------------------------------|-----|----------------------------------------------------------------------|-------------------------|-------------|
|       |                                          |     |                                                                      | Nucleotides             | Amino acids |
|       |                                          |     | Cytoskeleton proteins<br>Prokaryotic defense system                  |                         |             |
| 283   | Enolase                                  | G   | Glycolysis<br>Methane metabolism<br>RNA degradation                  | GTR+F+R6                | LG+F+R5     |
| 284   | Transcription elongation factor GreA     | K   | Transcription machinery                                              | GTR+F+R5                | LG+I+G4     |
| 285   | Carbamoyl-phosphate synthase large chain | F   | Alanine, aspartate and glutamate metabolism<br>Pyrimidine metabolism | GTR+F+R6                | LG+F+R6     |
| 286   | Carbamoyl-phosphate synthase small chain | F   | Alanine, aspartate and glutamate metabolism<br>Pyrimidine metabolism | GTR+F+R6                | LG+R5       |
| 287   | Transamidase GatB domain protein         | S   | Function unknown                                                     | TIM3+F+R5               | LG+F+I+G4   |
| 288   | RNA polymerase sigma factor RpoD         | K   | Transcription machinery                                              | GTR+F+R6                | LG+F+R5     |

---

25 Fig. S1. Maximum-likelihood tree based on 16S rRNA gene sequences showing the  
26 phylogenetic relationship of *Erythrobacteraceae* type strains. Bootstrap values are  
27 based on 1,000 replicates; only bootstrap values  $\geq 70\%$  are shown. Bar, 0.02  
28 substitutions per nucleotide position. Type species within the family  
29 *Erythrobacteraceae* are marked in bold. Red, orange, yellow, green, blue, indigo and  
30 purple represent the genera *Altererythrobacter*, *Croceibacterium*, *Croceicoccus*,  
31 *Erythrobacter*, *Erythromicrobium*, *Porphyrobacter* and *Qipengyuania*, respectively.  
32 *Rhodospirillum rubrum* ATCC 11170<sup>T</sup> was used as an outgroup.



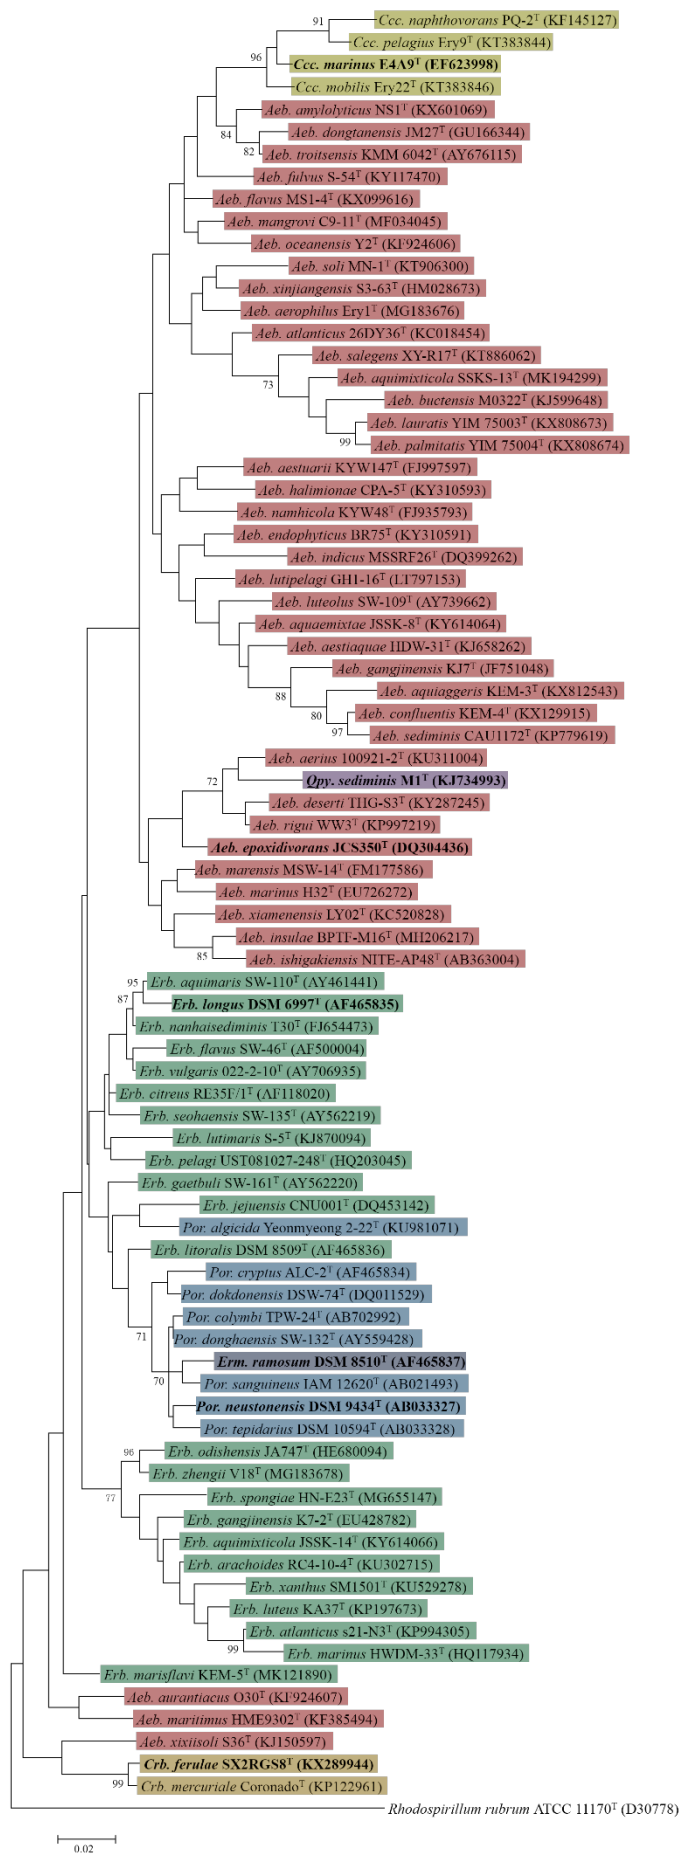

---

34 Fig. S2. Maximum-likelihood tree based on the concatenation of 288 single-copy OCs  
35 protein sequences showing the phylogenetic relationship of type strains belonging to  
36 the family *Erythrobacteraceae*. Bootstrap values are based on 100 replicates. Bar. 0.2  
37 substitutions per amino acid position. *Rhodospirillum rubrum* ATCC 11170<sup>T</sup> was used  
38 as an outgroup (not shown).

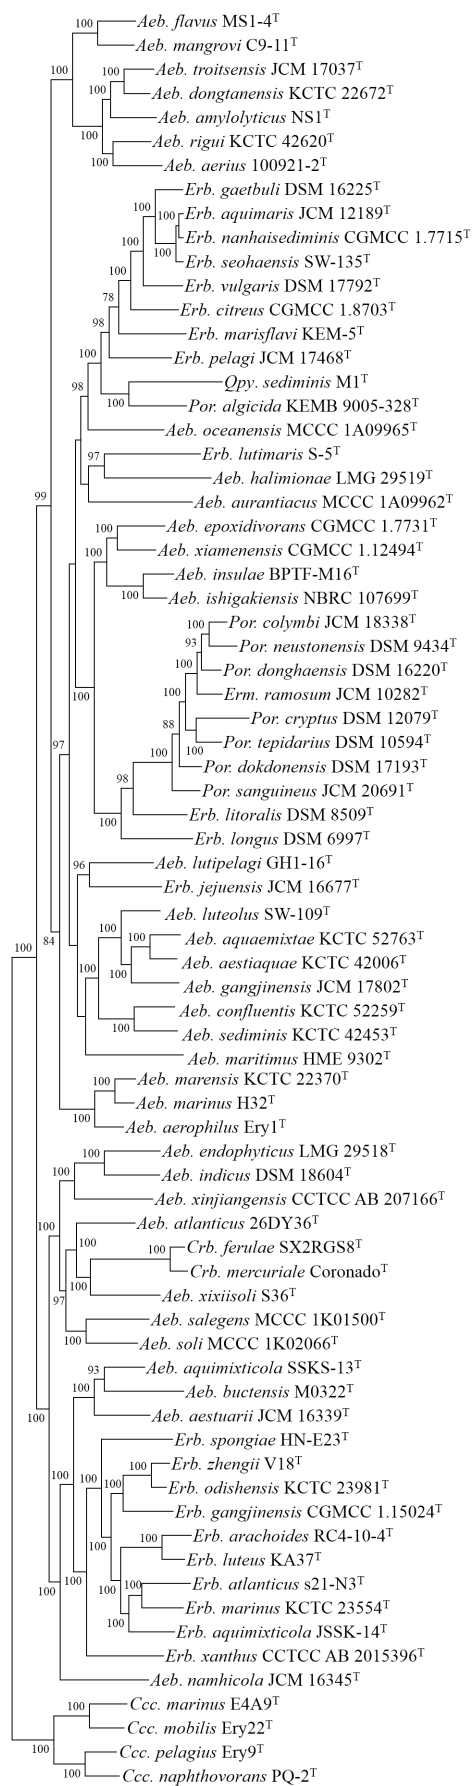

---

40 Fig. S3. Maximum-likelihood tree based on the partition of 288 single-copy OCs gene  
41 sequences showing the phylogenetic relationship of type strains belonging to the  
42 family *Erythrobacteraceae*. Bootstrap values are based on 100 replicates. Bar. 0.1  
43 substitutions per nucleotide position. *Rhodospirillum rubrum* ATCC 11170<sup>T</sup> was used  
44 as an outgroup (not shown).

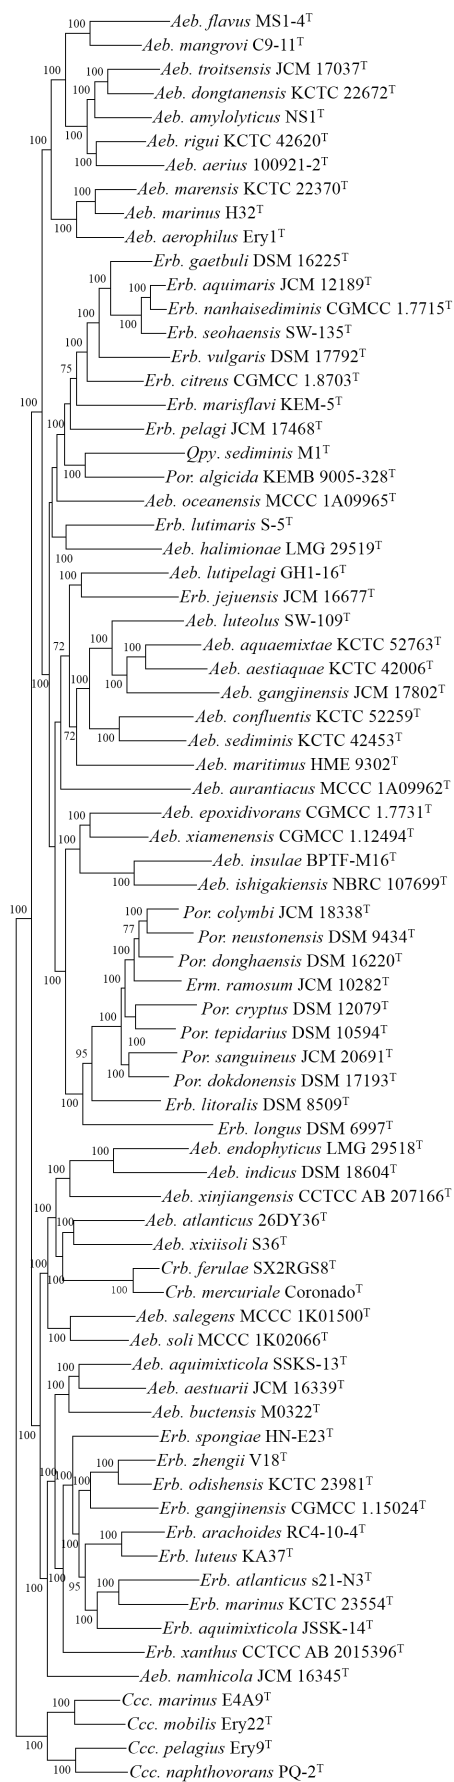

0.1

---

46 Fig. S4. Maximum-likelihood tree based on the concatenation of 288 single-copy OCs  
47 gene sequences showing the phylogenetic relationship of type strains belonging to the  
48 family *Erythrobacteraceae*. Bootstrap values are based on 100 replicates. Bar. 0.1  
49 substitutions per nucleotide position. *Rhodospirillum rubrum* ATCC 11170<sup>T</sup> was used  
50 as an outgroup (not shown).

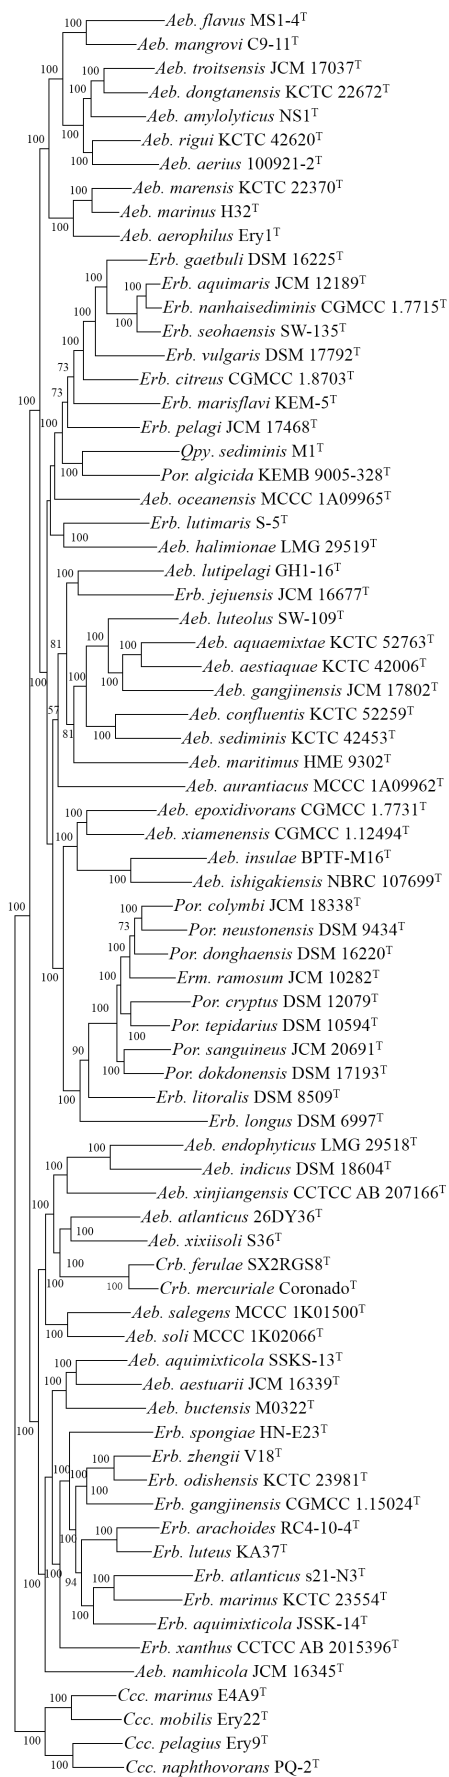

52 Fig. S5. A heatmap of ANI values for 74 type strains within the family

53 *Erythrobacteraceae*.

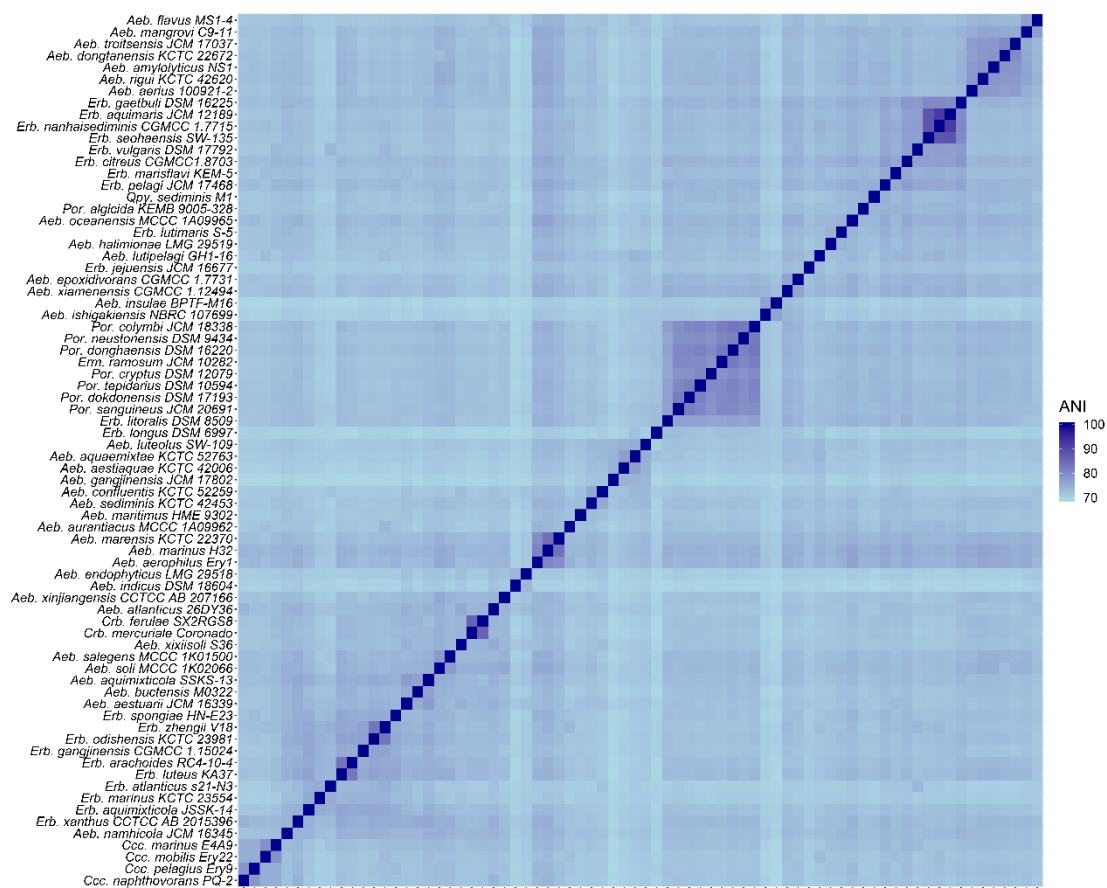

54



55 Fig. S6. A heatmap of AAI values for 74 type strains within the family  
 56 *Erythrobacteraceae*.

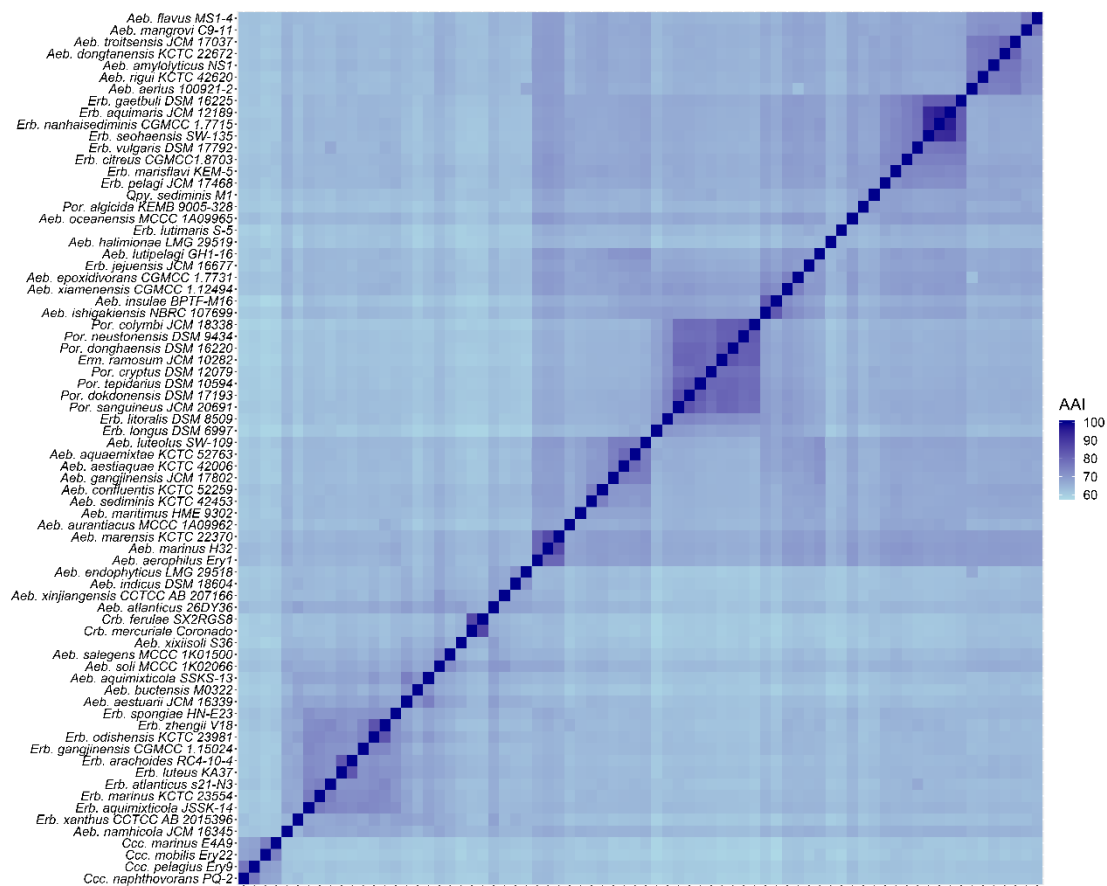

57

58 Fig. S7. A heatmap of POCP values for 74 type strains within the family  
 59 *Erythrobacteraceae*.

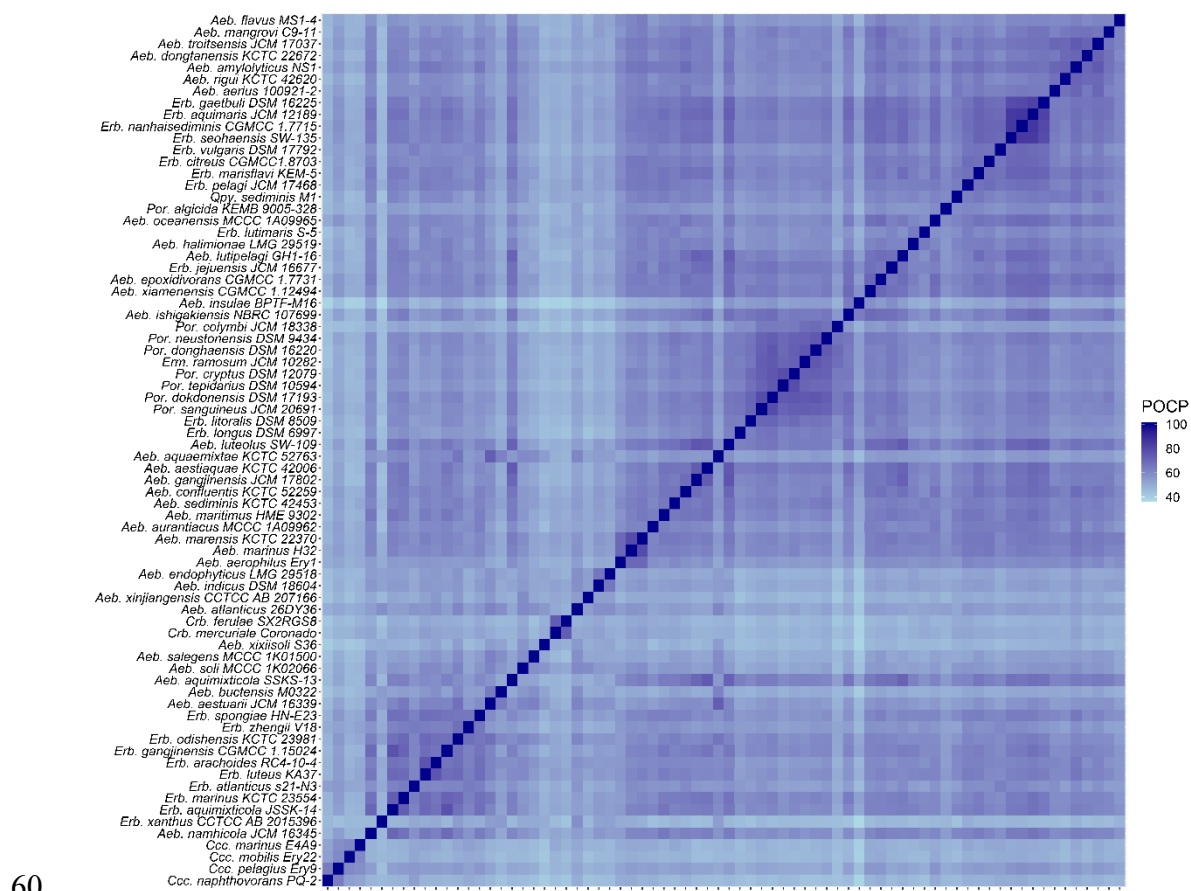

61 Fig. S8. Maximum-likelihood tree based on protein sequences of aerobic anoxygenic  
62 photosynthesis. Bootstrap values are based on 1,000 replicates; only bootstrap values  
63  $\geq 70\%$  are shown. Bar, 0.05 substitutions per amino acid position. *Sphingomonas*  
64 *sanxanigenens* NX02<sup>T</sup> was used as an outgroup.

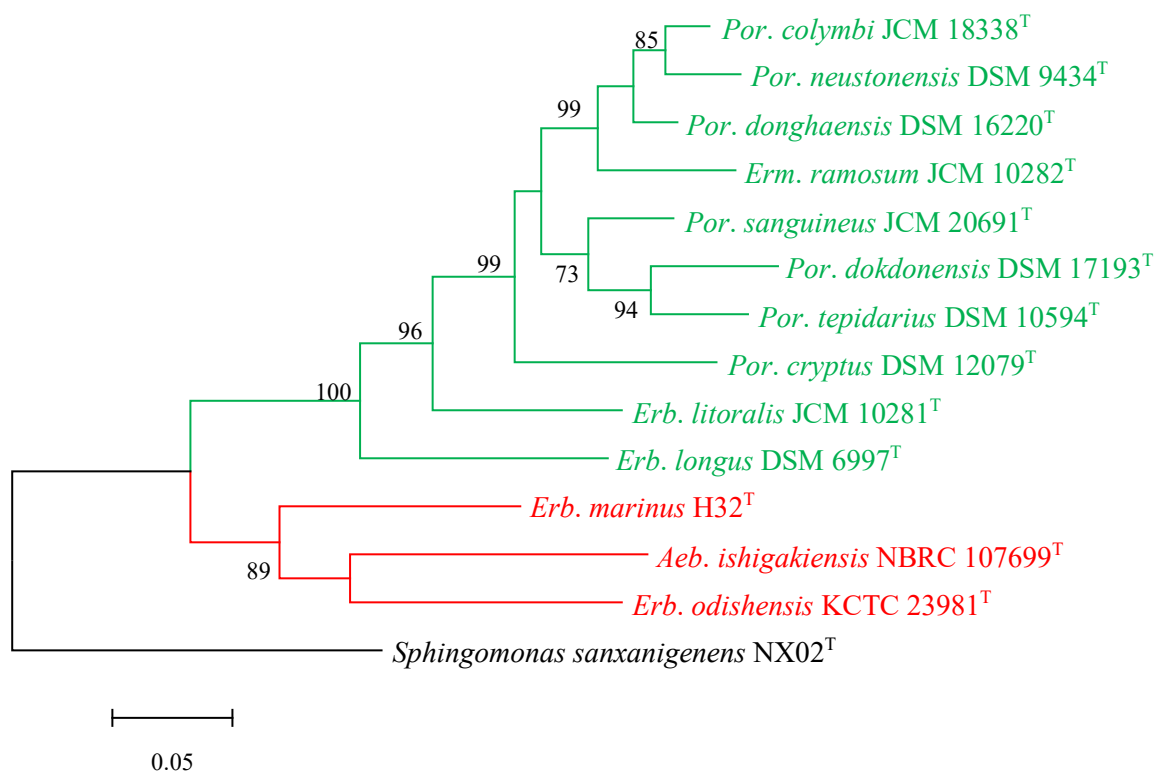

65 **References**

- 66 1. **Xue H, Piao C-G, Guo M-W, Wang L-F, Fang W *et al.*** Description of  
67 *Altererythrobacter aeri* sp. nov., isolated from air, and emended description of  
68 the genus *Altererythrobacter*. *Int J Syst Evol Microbiol* 2016;66:4543-4548.
- 69 2. **Meng F-X, Li G, Fang C, Wu Y-H, Cheng H *et al.*** *Altererythrobacter*  
70 *aerophilus* sp. nov., isolated from deep-sea water of the north-west Pacific. *Int J*  
71 *Syst Evol Microbiol* 2019;69:1689-1695.
- 72 3. **Jung Y-T, Park S, Lee J-S, Yoon J-H.** *Altererythrobacter aestiaquae* sp. nov.,  
73 isolated from seawater. *Int J Syst Evol Microbiol* 2014;64:3943-3949.
- 74 4. **Park SC, Baik KS, Choe HN, Lim C-H, Kim HJ *et al.*** *Altererythrobacter*  
75 *namhicola* sp. nov. and *Altererythrobacter aestuarii* sp. nov., isolated from  
76 seawater. *Int J Syst Evol Microbiol* 2011;61:709-715.
- 77 5. **Qu J-H, Ma W-W, Li H-F, Wang X-F, Lu B-B *et al.*** *Altererythrobacter*  
78 *amyolyticus* sp. nov., isolated from lake sediment. *Int J Syst Evol Microbiol*  
79 2019;69:1231-1236.
- 80 6. **Park S, Jung Y-T, Choi SJ, Yoon J-H.** *Altererythrobacter aquaemixtae* sp. nov.,  
81 isolated from the junction between the ocean and a freshwater spring. *Int J Syst*  
82 *Evol Microbiol* 2017;67:3446-3451.
- 83 7. **Jung Y-T, Park S, Lee J-S, Yoon J-H.** *Altererythrobacter aquiaggeris* sp. nov.,  
84 isolated from water of an estuary bank. *Int J Syst Evol Microbiol* 2017;67:3410-  
85 3416.
- 86 8. **Park S, Park J-M, Yoon J-H.** *Altererythrobacter aquimixticola* sp. nov., isolated  
87 from sediment sampled at the junction between the ocean and a freshwater spring.  
88 *Int J Syst Evol Microbiol* 2019;69:2408-2414.
- 89 9. **Wu Y-H, Xu L, Meng F-X, Zhang D-S, Wang C-S *et al.*** *Altererythrobacter*  
90 *atlanticus* sp. nov., isolated from deep-sea sediment. *Int J Syst Evol Microbiol*  
91 2014;64:116-121.
- 92 10. **Zhang G, Yang Y, Wang L.** *Altererythrobacter aurantiacus* sp. nov., isolated  
93 from deep-sea sediment. *Antonie van Leeuwenhoek* 2016;109:1245-1251.
- 94 11. **Zhang W, Yuan X, Feng Q, Zhang R, Zhao X *et al.*** *Altererythrobacter buctense*  
95 sp. nov., isolated from mudstone core. *Antonie van Leeuwenhoek* 2016;109:793-  
96 799.
- 97 12. **Park S, Jung Y-T, Park J-M, Yoon J-H.** *Altererythrobacter confluentis* sp. nov.,  
98 isolated from water of an estuary environment. *Int J Syst Evol Microbiol*  
99 2016;66:4002-4008.
- 100 13. **Yan Z-F, Lin P, Won K-H, Yang J-E, Li C-T *et al.*** *Altererythrobacter deserti* sp.  
101 nov., isolated from desert soil. *Int J Syst Evol Microbiol* 2017;67:3806-3811.
- 102 14. **Fan Z-Y, Xiao Y-P, Hui W, Tian G-R, Lee J-S *et al.*** *Altererythrobacter*  
103 *dongtanensis* sp. nov., isolated from a tidal flat. *Int J Syst Evol Microbiol*  
104 2011;61:2035-2039.
- 105 15. **Fidalgo C, Rocha J, Martins R, Proença DN, Morais PV *et al.***  
106 *Altererythrobacter halimionae* sp. nov. and *Altererythrobacter endophyticus* sp.

- 107 nov., two endophytes from the salt marsh plant *Halimione portulacoides*. *Int J*  
108 *Syst Evol Microbiol* 2017;67:3057-3062.
- 109 16. **Kwon KK, Woo J-H, Yang S-H, Kang J-H, Kang SG et al.** *Altererythrobacter*  
110 *epoxidivorans* gen. nov., sp. nov., an epoxide hydrolase-active, mesophilic marine  
111 bacterium isolated from cold-seep sediment, and reclassification of *Erythrobacter*  
112 *luteolus* Yoon et al. 2005 as *Altererythrobacter luteolus* comb. nov. *Int J Syst Evol*  
113 *Microbiol* 2007;57:2207-2211.
- 114 17. **Ma H, Ren H, Huang L, Luo Y.** *Altererythrobacter flavus* sp. nov., isolated from  
115 mangrove sediment. *Int J Syst Evol Microbiol* 2018;68:2265-2270.
- 116 18. **Dahal RH, Kim J.** *Altererythrobacter fulvus* sp. nov., a novel alkalitolerant  
117 alphaproteobacterium isolated from forest soil. *Int J Syst Evol Microbiol*  
118 2018;6:1502-1508.
- 119 19. **Jeong SH, Jin HM, Lee HJ, Jeon CO.** *Altererythrobacter gangjinensis* sp. nov.,  
120 a marine bacterium isolated from a tidal flat. *Int J Syst Evol Microbiol*  
121 2013;63:971-976.
- 122 20. **Kumar NR, Nair S, Langer S, Busse HJ, Kämpfer P.** *Altererythrobacter*  
123 *indicus* sp. nov., isolated from wild rice (*Porteresia coarctata* Tateoka). *Int J Syst*  
124 *Evol Microbiol* 2008;58:839-844.
- 125 21. **Park S, Park J-M, Oh T-K, Yoon J-H.** *Altererythrobacter insulae* sp. nov., a  
126 lipolytic bacterium isolated from a tidal flat. *Int J Syst Evol Microbiol*  
127 2019;69:1009-1015.
- 128 22. **Matsumoto M, Iwama D, Arakaki A, Tanaka A, Tanaka T et al.**  
129 *Altererythrobacter ishigakiensis* sp. nov., an astaxanthin-producing bacterium  
130 isolated from a marine sediment. *Int J Syst Evol Microbiol* 2011;61:2956-2961.
- 131 23. **Yuan C-G, Chen X, Jiang Z, Chen W, Liu L et al.** *Altererythrobacter lauratis*  
132 sp. nov. and *Altererythrobacter palmitatis* sp. nov., isolated from a Tibetan hot  
133 spring. *Antonie van Leeuwenhoek* 2017;110:1077-1086.
- 134 24. **Yoon J-H, Kang KH, Yeo S-H, Oh T-K.** *Erythrobacter luteolus* sp. nov., isolated  
135 from a tidal flat of the Yellow Sea in Korea. *Int J Syst Evol Microbiol*  
136 2005;55:1167-1170.
- 137 25. **Lee SD.** *Altererythrobacter lutipelagi* sp. nov., isolated from a tidal mudflat, and  
138 emended description of the genus *Altererythrobacter*. *Int J Syst Evol Microbiol*  
139 2019;69:1980-1985.
- 140 26. **Liao H, Li Y, Zhang M, Lin X, Lai Q et al.** *Altererythrobacter mangrovi* sp.  
141 nov., isolated from mangrove sediment. *Int J Syst Evol Microbiol* 2017;67:4851-  
142 4856.
- 143 27. **Seo SH, Lee SD.** *Altererythrobacter marensis* sp. nov., isolated from seawater. *Int*  
144 *J Syst Evol Microbiol* 2010;60:307-311.
- 145 28. **Lai Q, Yuan J, Shao Z.** *Altererythrobacter marinus* sp. nov., isolated from deep  
146 seawater. *Int J Syst Evol Microbiol* 2009;59:2973-2976.
- 147 29. **Kang H, Kim H, Joh K.** *Altererythrobacter maritimus* sp. nov., isolated from  
148 seawater. *Int J Syst Evol Microbiol* 2019;69:1566-1572.

- 
- 149 30. **Yang Y, Zhang G, Sun Z, Cheung MK, Huang C.** *Altererythrobacter*  
150 *oceanensis* sp. nov., isolated from the Western Pacific. *Antonie van Leeuwenhoek*  
151 2014;106:1191-1198.
- 152 31. **Kang JW, Kim MS, Lee JH, Baik KS, Seong CN.** *Altererythrobacter rigui* sp.  
153 nov., isolated from wetland freshwater. *Int J Syst Evol Microbiol* 2016;66:2491-  
154 2496.
- 155 32. **Liang X, Lin H, Wang K, Liao Y, Lai Q et al.** *Altererythrobacter salegens* sp.  
156 nov., a slightly halophilic bacterium isolated from surface sediment. *Int J Syst*  
157 *Evol Microbiol* 2017;67:909-913.
- 158 33. **Kim J-H, Yoon J-H, Kim W.** *Altererythrobacter sediminis* sp. nov., isolated from  
159 lagoon sediments. *Int J Syst Evol Microbiol* 2016;66:5424-5429.
- 160 34. **Zhao Q, Li H-R, Han Q-Q, He A-L, Nie C-Y et al.** *Altererythrobacter soli* sp.  
161 nov., isolated from desert sand. *Int J Syst Evol Microbiol* 2017;67:454-459.
- 162 35. **Nedashkovskaya OI, Cho S-H, Joung Y, Joh K, Kim MN et al.**  
163 *Altererythrobacter troitsensis* sp. nov., isolated from the sea urchin  
164 *Strongylocentrotus intermedius*. *Int J Syst Evol Microbiol* 2013;63:93-97.
- 165 36. **Lei X, Li Y, Chen Z, Zheng W, Lai Q et al.** *Altererythrobacter xiamenensis* sp.  
166 nov., an algicidal bacterium isolated from red tide seawater. *Int J Syst Evol*  
167 *Microbiol* 2014;64:631-637.
- 168 37. **Xue X, Zhang K, Cai F, Dai J, Wang Y et al.** *Altererythrobacter xinjiangensis*  
169 sp. nov., isolated from desert sand, and emended description of the genus  
170 *Altererythrobacter*. *Int J Syst Evol Microbiol* 2012;62:28-32.
- 171 38. **Yuan N, Zeng Y, Feng H, Yu Z, Huang Y.** *Altererythrobacter xixiisoli* sp. nov.,  
172 isolated from wetland soil. *Int J Syst Evol Microbiol* 2017;67:3655-3659.
- 173 39. **Liu Y-H, Fang B-Z, Dong Z-Y, Li L, Mohamad OAA et al.** *Croceibacterium*  
174 gen. nov., with description of *Croceibacterium ferulae* sp. nov., an endophytic  
175 bacterium isolated from *Ferula sinkiangensis* K. M. Shen and reclassification of  
176 *Porphyrobacter mercurialis* as *Croceibacterium mercuriale* comb. nov. *Int J Syst*  
177 *Evol Microbiol* 2019;69:2547-2554.
- 178 40. **Coil DA, Flanagan JC, Stump A, Alexiev A, Lang JM et al.** *Porphyrobacter*  
179 *mercurialis* sp nov., isolated from a stadium seat and emended description of the  
180 genus *Porphyrobacter*. *PeerJ* 2015;3.
- 181 41. **Xu X-W, Wu Y-H, Wang C-S, Wang X-G, Oren A et al.** *Croceicoccus marinus*  
182 gen. nov., sp nov., a yellow-pigmented bacterium from deep-sea sediment, and  
183 emended description of the family *Erythrobacteraceae*. *Int J Syst Evol Microbiol*  
184 2009;59:2247-2253.
- 185 42. **Wu Y-H, Li G-Y, Jian S-L, Cheng H, Huo Y-Y et al.** *Croceicoccus pelagius* sp.  
186 nov. and *Croceicoccus mobilis* sp. nov., isolated from marine environments. *Int J*  
187 *Syst Evol Microbiol* 2016;61:4506-4511.
- 188 43. **Huang Y, Zeng Y, Feng H, Wu Y, Xu X.** *Croceicoccus naphthovorans* sp. nov., a  
189 polycyclic aromatic hydrocarbons-degrading and acylhomoserine-lactone-

- 190 producing bacterium isolated from marine biofilm, and emended description of  
191 the genus *Croceicoccus*. *Int J Syst Evol Microbiol* 2015;65:1531-1536.
- 192 44. **Yoon J-H, Kang K-H, Oh T-K, Park Y-H.** *Erythrobacter aquimaris* sp. nov.,  
193 isolated from sea water of a tidal flat of the Yellow Sea in Korea. *Int J Syst Evol*  
194 *Microbiol* 2004;54:1981-1985.
- 195 45. **Park S, Jung Y-T, Choi SJ, Yoon J-H.** *Erythrobacter aquimixticola* sp. nov.,  
196 isolated from the junction between the ocean and a freshwater spring. *Int J Syst*  
197 *Evol Microbiol* 2017;67:2964-2969.
- 198 46. **Xing T, Liu Y, Wang N, Xu B, Liu K et al.** *Erythrobacter arachoides* sp. nov.,  
199 isolated from ice core. *Int J Syst Evol Microbiol* 2017;67:4235-4239.
- 200 47. **Zhuang L, Liu Y, Wang L, Wang W, Shao Z.** *Erythrobacter atlanticus* sp. nov.,  
201 a bacterium from ocean sediment able to degrade polycyclic aromatic  
202 hydrocarbons. *Int J Syst Evol Microbiol* 2015;65:3714-3719.
- 203 48. **Denner EB, Vybiral D, Koblížek M, Kämpfer P, Busse HJ et al.** *Erythrobacter*  
204 *citreus* sp. nov., a yellow-pigmented bacterium that lacks bacteriochlorophyll *a*,  
205 isolated from the western Mediterranean Sea. *Int J Syst Evol Microbiol*  
206 2002;52:1655-1661.
- 207 49. **Yoon J-H, Kim H, Kim I-G, Kang KH, Park Y-H.** *Erythrobacter flavus* sp.  
208 nov., a slight halophile from the East Sea in Korea. *Int J Syst Evol Microbiol*  
209 2003;53:1169-1174.
- 210 50. **Yoon J-H, Oh T-K, Park Y-H.** *Erythrobacter seohaensis* sp. nov. and  
211 *Erythrobacter gaetbuli* sp. nov., isolated from a tidal flat of the Yellow Sea in  
212 Korea. *Int J Syst Evol Microbiol* 2005;55:71-75.
- 213 51. **Lee YS, Lee D-H, Kahng H-Y, Kim EM, Jung JS.** *Erythrobacter gangjinensis*  
214 sp. nov., a marine bacterium isolated from seawater. *Int J Syst Evol Microbiol*  
215 2010;60:1413-1417.
- 216 52. **Yoon B-J, Lee D-H, Oh D-C.** *Erythrobacter jejuensis* sp. nov., isolated from  
217 seawater. *Int J Syst Evol Microbiol* 2013;63:1421-1426.
- 218 53. **Yurkov V, Stackebrandt E, Holmes A, Fuerst JA, Hugenholtz P et al.**  
219 Phylogenetic positions of novel aerobic, bacteriochlorophyll *a*-containing bacteria  
220 and description of *Roseococcus thiosulfatophilus* gen. nov., sp. nov.,  
221 *Erythromicrobium ramosum* gen. nov., sp. nov., and *Erythrobacter litoralis* sp.  
222 nov. *Int J Syst Bacteriol* 1994;44:427-434.
- 223 54. **Shiba T, Simidu U.** *Erythrobacter longus* gen. nov., sp. nov., an aerobic  
224 bacterium which contains bacteriochlorophyll *a*. *Int J Syst Bacteriol* 1982;32:211-  
225 217.
- 226 55. **Lei X, Zhang H, Chen Y, Li Y, Chen Z et al.** *Erythrobacter luteus* sp. nov.,  
227 isolated from mangrove sediment. *Int J Syst Evol Microbiol* 2015;65:2472-2478.
- 228 56. **Jung Y-T, Park S, Lee J-S, Yoon J-H.** *Erythrobacter lutimaris* sp. nov., isolated  
229 from a tidal flat sediment. *Int J Syst Evol Microbiol* 2014;64:4184-4190.
- 230 57. **Jung Y-T, Park S, Oh T-K, Yoon J-H.** *Erythrobacter marinus* sp. nov., isolated  
231 from seawater. *Int J Syst Evol Microbiol* 2012;62:2050-2055.

- 232 58. **Park S, Won SM, Yoon J-H.** *Erythrobacter marisflavi* sp. nov., isolated from  
233 isolated from estuary water. *Int J Syst Evol Microbiol* 2019;69:2696-2702.
- 234 59. **Xu M, Xin Y, Yu Y, Zhang J, Zhou Y et al.** *Erythrobacter nanhaisediminis* sp.  
235 nov., isolated from marine sediment of the South China Sea. *Int J Syst Evol*  
236 *Microbiol* 2010;60:2215-2220.
- 237 60. **Subhash Y, Tushar L, Sasikala C, Ramana CV.** *Erythrobacter odishensis* sp.  
238 nov. and *Pontibacter odishensis* sp. nov. isolated from dry soil of a solar saltern.  
239 *Int J Syst Evol Microbiol* 2013;63:4524-4532.
- 240 61. **Wu H-X, Lai PY, Lee OO, Zhou X-J, Miao L et al.** *Erythrobacter pelagi* sp  
241 nov., a member of the family *Erythrobacteraceae* isolated from the Red Sea. *Int J*  
242 *Syst Evol Microbiol* 2012;62:1348-1353.
- 243 62. **Zhuang L, Lin B, Xu L, Li G, Wu C-J et al.** *Erythrobacter spongiae* sp. nov.,  
244 isolated from marine sponge. *Int J Syst Evol Microbiol* 2019;69:1111-1116.
- 245 63. **Ivanova EP, Bowman JP, Lysenko AM, Zhukova NV, Gorshkova NM et al.**  
246 *Erythrobacter vulgaris* sp. nov., a novel organism isolated from the marine  
247 invertebrates. *Syst Appl Microbiol* 2005;28:123-130.
- 248 64. **Li D-D, Zhang Y-Q, Peng M, Wang N, Wang X-J et al.** *Erythrobacter xanthus*  
249 sp. nov., isolated from surface seawater of the South China Sea. *Int J Syst Evol*  
250 *Microbiol* 2017;67:2459-2464.
- 251 65. **Fang C, Wu Y-H, Sun C, Wang H, Cheng H et al.** *Erythrobacter zhengii* sp.  
252 nov., a bacterium isolated from deep-sea sediment. *Int J Syst Evol Microbiol*  
253 2019;69:241-248.
- 254 66. **Kristyanto S, Lee SD, Kim J.** *Porphyrobacter algicida* sp. nov., an algalytic  
255 bacterium isolated from seawater. *Int J Syst Evol Microbiol* 2017;67:4526-4533.
- 256 67. **Furuhata K, Edagawa A, Miyamoto H, Kawakami Y, Fukuyama M.**  
257 *Porphyrobacter colymbi* sp. nov. isolated from swimming pool water in Tokyo,  
258 Japan. *J Gen Appl Microbiol* 2013;59:245-250.
- 259 68. **Rainey FA, Silva J, Nobre MF, Silva MT, da Costa MS.** *Porphyrobacter*  
260 *cryptus* sp. nov., a novel slightly thermophilic, aerobic, bacteriochlorophyll *a*-  
261 containing species. *Int J Syst Evol Microbiol* 2003;53:35-41.
- 262 69. **Yoon J-H, Kang S-J, Lee M-H, Oh HW, Oh T-K.** *Porphyrobacter dokdonensis*  
263 sp. nov., isolated from sea water. *Int J Syst Evol Microbiol* 2006;56:1079-1083.
- 264 70. **Yoon J-H, Lee M-H, Oh T-K.** *Porphyrobacter donghaensis* sp. nov., isolated  
265 from sea water of the East Sea in Korea. *Int J Syst Evol Microbiol* 2004;54:2231-  
266 2235.
- 267 71. **Fuerst JA, Hawkins JA, Holmes A, Sly LI, Moore CJ et al.** *Porphyrobacter*  
268 *neustonensis* gen. nov., sp. nov., an aerobic bacteriochlorophyll-synthesizing  
269 budding bacterium from fresh water. *Int J Syst Bacteriol* 1993;43:125-134.
- 270 72. **Hiraishi A, Yonemitsu Y, Matsushita M, Shin YK, Kuraishi H et al.**  
271 Characterization of *Porphyrobacter sanguineus* sp. nov., an aerobic  
272 bacteriochlorophyll-containing bacterium capable of degrading biphenyl and  
273 dibenzofuran. *Arch Microbiol* 2002;178:45-52.



- 
- 274 73. **Hanada S, Kawase Y, Hiraishi A, Takaichi S, Matsuura K et al.**  
275 *Porphyrobacter tepidarius* sp. nov., a moderately thermophilic aerobic  
276 photosynthetic bacterium isolated from a hot spring. *Int J Syst Bacteriol*  
277 1997;47:408-413.
- 278 74. **Feng X-M, Mo Y-X, Han L, Nogi Y, Zhu Y-H et al.** *Qipengyuania sediminis*  
279 gen. nov., sp. nov., a member of the family *Erythrobacteraceae* isolated from  
280 subterrestrial sediment. *Int J Syst Evol Microbiol* 2015;65:3658-3665.
